# Supplementary material for: Synthesis and properties of gem-dinitro energetic salts based on 1,2,4-oxadiazole with low impact sensitivity
Source: Royal Society of Chemistry journal article supplement (doi:10.1039/d0nj05530a), 2020-12-15
Supplement: d0nj05530a1.pdf [file d0nj05530a1.pdf]

## Synthesis and Properties of Gem-dinitro Energetic Salts Based on 1,2,4-Oxadiazole with Low Impact Sensitivity

Tian Lu,<sup>a</sup> He Yuna,<sup>a</sup> Song Jia,<sup>a</sup> Zhengwen Hou,<sup>a</sup> Hongquan Yin,<sup>a</sup> Guijuan Fan,<sup>b</sup> and Fu-Xue Chen<sup>a\*</sup>

*a. School of Chemistry & Chemical Engineering, Beijing Institute of Technology (Liangxiang Campus), No. 8 Liangxiang east road, Fangshan district, Beijing 102488, China. E-mail: fuxue.chen@bit.edu.cn*

*b. Institute of Chemical Materials, China Academy of Engineering Physics, Mianyang 621050, Sichuan, China.*

### Contents

|                                                  |     |
|--------------------------------------------------|-----|
| 1. Experimental section.....                     | S2  |
| 2. Gaussian Calculations.....                    | S3  |
| 3. References.....                               | S6  |
| 4. Screening of Reaction Time for <b>3</b> ..... | S7  |
| 5. X-ray Diffraction .....                       | S7  |
| 6. Copies of Spectra.....                        | S22 |

## 1. Experimental section

**Caution** All the nitrogen-rich compounds may explode under certain conditions although no explosion was encountered in the procedure of preparing these energetic materials. Thus, it is indispensable to keep safeguard procedures and keep experiments in a small scale at the same time.

**General**  $^1\text{H}$  NMR and  $^{13}\text{C}$  NMR spectra were recorded on a 400 MHz (Bruker Avance 400) nuclear magnetic resonance spectrometers operating at 400 and 100 MHz, respectively. Chemical shifts are reported in ppm relative to  $\text{Me}_4\text{Si}$ . Differential scanning calorimeter (DSC, Shimadzu TA-60ws) was used to measure the melting temperatures and decomposition temperatures at a heating rate of  $10\text{ }^\circ\text{C min}^{-1}$  under argon atmosphere. IR spectra were recorded using KBr pellets for solids on a Bruker ALPHA FT-IR Spektrometer. HRMS was recorded on Bruker Apex IV FTMS. All chemicals were bought from commercial companies and used directly unless otherwise noted. The sensitivities towards impact and friction were determined using a drop hammer and a BAM friction tester.

Compound **1** was synthesized according to the literature.<sup>[S1]</sup>

**N-Hydroxy-5-methyl-1,2,4-oxadiazole-3-carbimidoyl chloride (2)**: To a solution of N'-Hydroxy-5-methyl-1,2,4-oxadiazole-3-carboximidamide (**1**, 2.63 g, 18.50 mmol) in a mixture of concentrated HCl (9.2 mL) and water (30.0 mL) was added the solution of sodium nitrite (1.40 g, 20.40 mmol) in 5.00 mL water while always keeping the temperature between 0-5  $^\circ\text{C}$ . The reaction mixture was stirred for 8 h with the temperature warming up to ambient temperature. The solid was collected by filtration, washed with ice-water, and dried in air to give **2** as a white solid (2.55 g, 85.34%).  $T_{\text{m(peak)}} = 156.20\text{ }^\circ\text{C}$ .  $^1\text{H}$  NMR (400 MHz, DMSO- $d_6$ ):  $\delta_{\text{H}} = 2.65$  (s, 3H,  $\text{CH}_3$ ), 13.42 (s, 1H, NOH) ppm.  $^{13}\text{C}$  NMR (100 MHz, DMSO- $d_6$ ):  $\delta_{\text{C}} = 12.55$  (s, 1C,  $\text{CH}_3$ ), 125.82 (s, 1C, CCl), 164.20 (s, 1C, NCN), 178.91 (s, 1C, OCN) ppm. IR: 3213 (m), 3155 (m), 3092 (m), 2989 (w), 2924 (w), 2858 (m), 1578 (vs), 1506 (s), 1422 (m), 1383 (m), 1277(m), 1078(vs), 1018 (vs), 937 (s), 829 (w), 783(w), 719 (w), 654(w), 472(m)  $\text{cm}^{-1}$ ; HRMS: calc. for  $\text{C}_4\text{H}_5\text{ClN}_3\text{O}_2$  [ $\text{M} + \text{H}$ ] $^+$ : 162.0065, found: 162.0065.

**3-(Chlorodinitromethyl)-5-methyl-1,2,4-oxadiazole (3)**: **2** (161.50 mg, 1.00 mmol) was added dropwise to a stirred mixture of fuming  $\text{HNO}_3$  (0.8 mL) and trifluoroacetic acid anhydride (1.4 mL) at 0  $^\circ\text{C}$ . The mixture was allowed to warm slowly to room temperature and stirred for 8 h. It was poured into ice water (30.0 mL) and filtered to give **3** as a white solid (96.00 mg, 43.13%), which was dissolved in the mixture of petroleum ether and ethyl acetate (2:1) and evaporating slowly at 4  $^\circ\text{C}$  to give colorless block crystal suitable for X-ray diffraction.  $T_{\text{m(peak)}} = 65.03\text{ }^\circ\text{C}$ .  $^1\text{H}$  NMR (400 MHz, DMSO- $d_6$ ):  $\delta_{\text{H}} = 2.78$  (s, 3H,  $\text{CH}_3$ ) ppm.  $^{13}\text{C}$  NMR (100 MHz, DMSO- $d_6$ ):  $\delta_{\text{C}} = 12.89$  (s, 1C,  $\text{CH}_3$ ), 161.95 (s, 1C, NCN), 181.98 (s, 1C, OCN) ppm. IR: 2926 (s), 1610 (vs), 1580 (vs), 1514 (m), 1384 (m), 1300 (m), 1261(s), 1093(vs), 975 (m), 918 (w), 824 (vs), 792(vs), 709 (m), 698(m), 644(w)  $\text{cm}^{-1}$ .

**Potassium (5-methyl-1,2,4-oxadiazol-3-yl)dinitromethanide (4)**: **3** (400.00 mg, 1.80 mmol) was dissolved in methanol (16.0 mL) and then the solution of potassium iodide (598.00 mg, 3.60 mmol) in methanol (8.0 mL) was added dropwise and the reaction mixture turn to reddish brown immediately. Keep stirring for 12 h at 25  $^\circ\text{C}$  followed by filtration and washed with cold methanol (3.0 mL) to give precipitate **3** (343.00 mg, 84.69%).  $T_{\text{d(onset)}} = 178.20\text{ }^\circ\text{C}$ .  $^1\text{H}$  NMR (400 MHz, DMSO- $d_6$ ):  $\delta_{\text{H}} = 2.61$  (s, 2H,  $\text{CH}_3$ ) ppm.  $^{13}\text{C}$  NMR (100 MHz, DMSO- $d_6$ ):  $\delta_{\text{C}} = 12.44$  (s,  $\text{CH}_3$ ), 123.32 (s, 1C, C ( $\text{NO}_2$ ) $_2$ ), 163.45 (s, 1C, NCN), 176.98 (s, 1C, OCN) ppm. IR: 1585 (m), 1541 (s), 1472 (s), 1391 (m), 1371 (w), 1232(vs), 1138 (vs), 827 (m), 785 (w), 754 (s)  $\text{cm}^{-1}$ ; HRMS:  $\text{C}_4\text{H}_3\text{N}_4\text{O}_5$  [ $\text{M} - \text{K}$ ] $^-$ : 187.0109, found: 187.0105.

### General method for preparing compounds 5–11:

Concentrated hydrochloric acid was added dropwise to the suspension of potassium salt **3** (163.00 mg, 0.72 mmol) in water (10.0 mL) while keep stirring at 0  $^\circ\text{C}$ . Then it was extracted with ethyl acetate ( $3 \times 10.0$  mL). The organic phases were combined, dried over anhydrous  $\text{Na}_2\text{SO}_4$ , and then concentrated under vacuum to obtain a yellow oil which was dissolved in MeOH (4.0 mL). Subsequently, various bases include ammonia in methanol (7 M, 0.3 mL, 2.00 mmol), 50% hydroxylamine solution (0.12 mL, 2.00 mmol), 80% hydrazine hydrate (0.1 mL, 2.00 mmol), 3-amino-1,2,4-triazole (60.40 mg, 0.72 mmol), 1,3-diaminourea (64.00 mg, 0.72 mmol),

aminoguanidinium carbonate (98.00 mg, 0.72 mmol) and guanidinium carbonate (64.00 mg, 0.72 mmol) was added. The mixture was stirred at ambient temperature for 8 h. The precipitate was filtered and dried in air to give yellow product **5-11**, respectively.

**Ammonium (5-methyl-1,2,4-oxadiazol-3-yl)dinitromethanide (5)**: (119.00 mg, 80.80%)  $T_{d(onset)} = 160.64$  °C.  $^1\text{H NMR}$  (400 MHz, DMSO- $d_6$ ):  $\delta_{\text{H}} = 2.61$  (s, 3H, CH<sub>3</sub>), 7.06 (s, 4H, NH<sub>4</sub>) ppm.  $^{13}\text{C NMR}$  (100 MHz, DMSO- $d_6$ ):  $\delta_{\text{C}} = 12.44$  (s, 1C, CH<sub>3</sub>), 123.27 (s, 1C, C(NO<sub>2</sub>)<sub>2</sub>), 163.43 (s, 1C, NCN), 176.98 (s, 1C, OCN) ppm. IR: 3226 (s), 3041(w), 2968(w), 2843 (w), 1579 (s), 1545 (vs), 1481 (m), 1456 (w), 1348(m), 1263(vs), 1139 (vs), 1115 (vs), 1041 (w), 970 (m), 897 (s), 818(vs), 744 (s), 700(m), 498(vs)  $\text{cm}^{-1}$ ; HRMS: calc. for C<sub>4</sub>H<sub>3</sub>N<sub>4</sub>O<sub>5</sub> [M – NH<sub>4</sub>]<sup>-</sup>: 187.0109, found: 187.0106.

**Hydroxylammonium (5-methyl-1,2,4-oxadiazol-3-yl)dinitromethanide (6)**: (103.00 mg, 64.65%)  $T_{d(onset)} = 147.74$  °C.  $^1\text{H NMR}$  (400 MHz, DMSO- $d_6$ ):  $\delta_{\text{H}} = 2.61$  (s, 3H, CH<sub>3</sub>), 8.55 (br, 4H, NH<sub>3</sub> OH) ppm.  $^{13}\text{C NMR}$  (100 MHz, DMSO- $d_6$ ):  $\delta_{\text{C}} = 12.39$ (s, 1C, CH<sub>3</sub>), 123.27 (s, 1C, C(NO<sub>2</sub>)<sub>2</sub>), 163.31 (s, 1C, NCN), 177.12 (s, 1C, OCN) ppm. IR: 3429(m), 3055 (m), 2937 (w), 2713 (w), 1581 (w), 1550(s), 1477 (s), 1361 (w), 1261(s), 1117 (vs), 979 (m), 893(w), 817 (s), 752 (s)  $\text{cm}^{-1}$ ; HRMS: calc. for C<sub>4</sub>H<sub>3</sub>N<sub>4</sub>O<sub>5</sub> [M – NH<sub>3</sub>OH]<sup>-</sup>: 187.0109, found: 187.0106.

**Hydrazinium (5-methyl-1,2,4-oxadiazol-3-yl)dinitromethanide (7)**: (123.00 mg, 77.60%)  $T_{d(onset)} = 165.53$  °C.  $^1\text{H NMR}$  (400 MHz, DMSO- $d_6$ ):  $\delta_{\text{H}} = 2.61$  (s, 2H, CH<sub>3</sub>), 6.98 (br, s, 5H, N<sub>2</sub>H<sub>5</sub>) ppm.  $^{13}\text{C NMR}$  (100 MHz, DMSO- $d_6$ ):  $\delta_{\text{C}} = 12.44$  (s, 1C, CH<sub>3</sub>), 123.23 (s, 1C, C(NO<sub>2</sub>)<sub>2</sub>), 163.42 (s, 1C, NCN), 176.99 (s, 1C, OCN) ppm. IR: 3373 (s), 3307 (m), 2933 (m), 2713 (w), 2612 (w), 1548 (s), 1473 (s), 1361 (w), 1301(w), 1257 (s), 1143 (m), 1117 (s), 977 (s), 889 (s), 819 (vs), 752 (s)  $\text{cm}^{-1}$ ; HRMS: calc. for C<sub>4</sub>H<sub>3</sub>N<sub>4</sub>O<sub>5</sub> [M – N<sub>2</sub>H<sub>7</sub>]<sup>-</sup>: 187.0109, found: 187.0119.

**5-Amino-1H-1,2,4-triazol-2-ium (5-methyl-1,2,4-oxadiazol-3-yl)dinitromethanide (8)**: (143.00 mg, 72.97%)  $T_{d(onset)} = 107.98$  °C.  $^1\text{H NMR}$  (400 MHz, DMSO- $d_6$ ):  $\delta_{\text{H}} = 2.61$  (s, 3H, CH<sub>3</sub>), 8.25(s, 2H, NH<sub>2</sub>) ppm.  $^{13}\text{C NMR}$  (100 MHz, DMSO- $d_6$ ):  $\delta_{\text{C}} = 12.44$  (s, 1C, CH<sub>3</sub>), 123.22 (s, 1C, C(NO<sub>2</sub>)<sub>2</sub>), 140.33 (s, 1C, NCNH), 151.71(s, 1C, NC(NH)NH<sub>2</sub>), 163.43 (s, 1C, NCN), 178.97 (s, 1C, OCN) ppm. IR: 3410 (vs), 3317 (s), 2965 (m), 1687(vs), 1577 (s), 1510 (vs), 1477 (s), 1419 (m), 1350 (vs), 1203 (vs), 1114 (m), 1045 (m), 945 (m), 908 (m), 866 (m), 750 (s), 711 (s), 513 (w)  $\text{cm}^{-1}$ ; HRMS: calc. for C<sub>4</sub>H<sub>3</sub>N<sub>4</sub>O<sub>5</sub> [M – C<sub>2</sub>N<sub>4</sub>H<sub>5</sub>]<sup>-</sup>: 187.0109, found: 187.0119.

**Diaminouronium (5-methyl-1,2,4-oxadiazol-3-yl)dinitromethanide (9)**: (172.00 mg, 85.87%)  $T_{d(onset)} = 136.60$  °C.  $^1\text{H NMR}$  (400 MHz, DMSO- $d_6$ ):  $\delta_{\text{H}} = 2.61$  (s, 3H, CH<sub>3</sub>), 8.35(br, s, 6H, NH<sub>2</sub>, NH<sub>2</sub>, NH<sub>2</sub>, ) ppm.  $^{13}\text{C NMR}$  (100 MHz, DMSO- $d_6$ ):  $\delta_{\text{C}} = 11.89$  (s, 1C, CH<sub>3</sub>), 122.73 (s, 1C, C(NO<sub>2</sub>)<sub>2</sub>), 159.02(s, 1C, NH<sub>1C</sub>ONH), 162.90 (s, 1C, NCN), 176.41 (s, 1C, OCN) ppm. IR: 3294 (s), 3145 (w), 2951 (m), 2671 (w), 1685(w), 1645 (s), 1581(m), 1550 (m), 1472 (vs), 1357 (s), 1246 (vs), 1136 (s), 1112 (s), 896 (m), 819 (vs), 748 (vs)  $\text{cm}^{-1}$ ; HRMS: calc. for C<sub>4</sub>H<sub>3</sub>N<sub>4</sub>O<sub>5</sub> [M – CON<sub>4</sub>H<sub>7</sub>]<sup>-</sup>: 187.0109, found: 187.0103.

**Aminoguanidinium (5-methyl-1,2,4-oxadiazol-3-yl)dinitromethanide (10)**: (122.00 mg, 64.63%)  $T_{d(onset)} = 146.78$  °C.  $^1\text{H NMR}$  (400 MHz, DMSO- $d_6$ ):  $\delta_{\text{H}} = 2.61$  (s, 2H, CH<sub>3</sub>), 4.67(s, 2H, NH<sub>2</sub>), 7.20 (br, s, 5H, NH<sub>2</sub>, NH<sub>2</sub>, H) ppm.  $^{13}\text{C NMR}$  (100 MHz, DMSO- $d_6$ ):  $\delta_{\text{C}} = 11.88$  (s, 1C, CH<sub>3</sub>), 122.67 (s, 1C, C(NO<sub>2</sub>)<sub>2</sub>), 158.67(s, 1C, C(NH<sub>2</sub>)<sub>2</sub>), 162.89 (s, 1C, NCN), 176.40 (s, 1C, OCN) ppm. IR: 3452 (m), 3425 (m), 3374 (w), 3283 (w), 3076(w), 2974 (w), 1663(vs), 1579 (m), 1543 (s), 1475 (vs), 1354 (m), 1255 (vs), 1143 (vs), 1114 (s), 962 (w), 906 (m), 821 (s), 750 (s), 648 (m), 482 (m)  $\text{cm}^{-1}$ ; HRMS: calc. for C<sub>4</sub>H<sub>3</sub>N<sub>4</sub>O<sub>5</sub> [M – CN<sub>4</sub>H<sub>7</sub>]<sup>-</sup>: 187.0109, found: 187.0106.

**Guanidinium (5-methyl-1,2,4-oxadiazol-3-yl)dinitromethanide (11)**: (124.00 mg, 69.68%)  $T_{d(onset)} = 185.20$  °C.  $^1\text{H NMR}$  (400 MHz, DMSO- $d_6$ ):  $\delta_{\text{H}} = 2.61$  (s, 2H, CH<sub>3</sub>), 6.89(s, 6H, NH<sub>2</sub>) ppm.  $^{13}\text{C NMR}$  (100 MHz, DMSO- $d_6$ ):  $\delta_{\text{C}} = 12.43$  (s, 1C, CH<sub>3</sub>), 123.20 (s, 1C, C(NO<sub>2</sub>)<sub>2</sub>), 158.33(s, 1C, C(NH<sub>2</sub>)<sub>3</sub>), 163.44 (s, 1C, NCN), 176.95 (s, 1C, OCN) ppm. IR: 3455 (s), 3418 (s), 3350 (s), 3269 (m), 3211(m), 3045(w), 2935 (w), 1654(vs), 1583 (m), 1535 (s), 1474 (vs), 1375 (m), 1265 (vs), 1149 (m), 1111 (s), 964 (w), 918 (m), 823 (s), 750 (s), 555 (m)  $\text{cm}^{-1}$ ; HRMS: calc. for C<sub>4</sub>H<sub>3</sub>N<sub>4</sub>O<sub>5</sub> [M – CN<sub>4</sub>H<sub>7</sub>]<sup>-</sup>: 187.0109, found: 187.0105.

## 2. Gaussian Calculations

The density and heats of formation (HOF) of **4-11** were calculated by the Gaussian09 suite of programs.<sup>[S2]</sup>

First, the geometric optimization of the structures and frequency analyses were accomplished by using the B3LYP with the 6-311+G\*\* basis set and optimized structures were used to calculate the density and heats of formation.

The HOF was determined by using an isodesmic reaction (Scheme S1). The HOF of other compounds in Scheme S1 were available in the NIST WebBook<sup>[S3]</sup> and literature references.<sup>[S4]</sup>

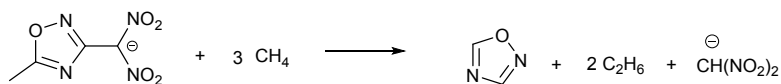

**Scheme S1** Isodesmic reactions for anions of **4-11**.

For the ionic salt **4-11**, the HOF can be simplified by the formula given in Eq (1) based on a Born-Haber energy cycle (Scheme S2),

$$\Delta H(\text{salts}, 298\text{K}) = \Delta H(\text{cation}, 298\text{K}) + \Delta H(\text{anion}, 298\text{K}) - \Delta H_L \quad (1)$$

where  $\Delta H_L$  is the lattice energy of the salts, which could be predicted by using the formula suggested by Jenkins et al [Eq (2)].<sup>[S5]</sup>

$$\Delta H_L = U_{pot} + \left[ p \left( \frac{n_M}{2} - 2 \right) + q \left( \frac{n_X}{2} - 2 \right) \right] RT \quad (2)$$

In this equation,  $n_M$  and  $n_X$  depend on the nature of the ions  $M_{p+}$  and  $X_{q-}$ , respectively, and are equal to three for monoatomic ions, five for linear polyatomic ions, and six for nonlinear polyatomic ions. The equation for lattice potential energy  $U_{pot}$  [Eq (3)] has the form:

$$U_{pot} [kJ mol^{-1}] = \gamma (\rho_m / M_m)^{\frac{1}{3}} + \delta \quad (3)$$

Where values for the coefficients  $\gamma$  (kJ mol<sup>-1</sup> cm) and  $\delta$  (kJ mol<sup>-1</sup>) are taken from the literature.<sup>[S6]</sup>

$\rho_m$  [g cm<sup>-3</sup>] is the density obtained by the formula given in [Eq (4)].  $M_m$  is the molecular weight, and  $V_m$  is the molar volume of the compound.

$$\rho_m = \frac{M_m}{V_m} \quad (4)$$

For ionic salts with hydrogen atoms, Eq (5) is utilized to get the corrected ionic volume. We can get a correction factor by the density of crystal to get the more accurate volume of anion.

$$V_{m(\text{ionic})} = pV_{M+} + qV_{X-} - [0.6763 + 0.9418 \times (\text{no. of hydrogen atoms in the ionic})] \quad (5)$$

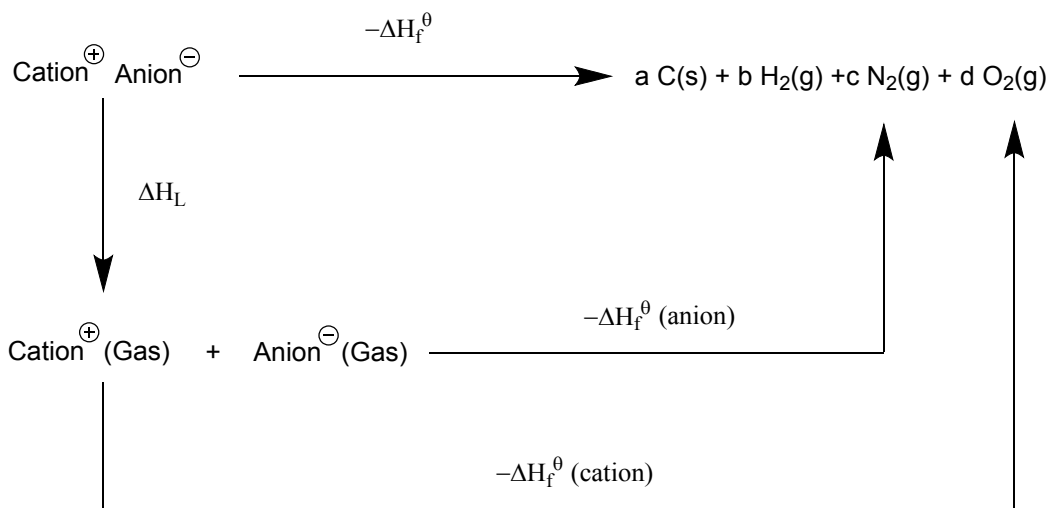

**Scheme S2.** Born-Haber cycle for the formation of energetic salts.

**Table S1** The molar volume, molecular weight and calculated densities for the title compounds at B3LYP/6-311+G\*\* level.

|           | $V_{M^+}$ [cm <sup>3</sup> mol <sup>-1</sup> ] | $V_{X^-}$ [cm <sup>3</sup> mol <sup>-1</sup> ] | $V_m$ [cm <sup>3</sup> mol <sup>-1</sup> ] | $M$ [g mol <sup>-1</sup> ] | $\rho_m$ [g cm <sup>-3</sup> ] |
|-----------|------------------------------------------------|------------------------------------------------|--------------------------------------------|----------------------------|--------------------------------|
| <b>5</b>  | 18.272                                         | 111.542                                        | 122.545                                    | 205.13                     | 1.674                          |
| <b>6</b>  | 26.118                                         | 111.542                                        | 130.391                                    | 221.129                    | 1.696                          |
| <b>8</b>  | 58.934                                         | 111.542                                        | 162.265                                    | 272.181                    | 1.677                          |
| <b>9</b>  | 65.286                                         | 111.542                                        | 166.734                                    | 278.185                    | 1.668                          |
| <b>10</b> | 57.165                                         | 111.542                                        | 158.613                                    | 262.186                    | 1.653                          |
| <b>11</b> | 48.543                                         | 111.542                                        | 147.165                                    | 247.171                    | 1.680                          |

**Table S2** Total energy and heat of formation for the title compounds at B3LYP/6-311+G\*\* level

|                                         | $E_0^a$<br>[hartree] | ZPE <sup>b</sup><br>[hartree] | $H_{\text{corr}}^c$<br>[hartree] | HOF <sup>d</sup><br>[kJ·mol <sup>-1</sup> ] |
|-----------------------------------------|----------------------|-------------------------------|----------------------------------|---------------------------------------------|
| CH <sub>4</sub>                         | -40.3984876          | 0.044793                      | 0.048605                         | -74.6 <sup>e</sup>                          |
| C <sub>2</sub> H <sub>6</sub>           | -79.6094381          | 0.074599                      | 0.079027                         | -84.0 <sup>e</sup>                          |
| CH(NO <sub>2</sub> ) <sub>2</sub> anion | -448.164078          | 0.039729                      | 0.046609                         | -217.0 <sup>f</sup>                         |
| 1,2,4-oxadiazole                        | -261.5727899         | 0.046538                      | 0.050909                         | 75.0 <sup>e</sup>                           |
| anion                                   | -747.7975938         | 0.093718                      | 0.106033                         | -193.2 <sup>f</sup>                         |
| <b>5</b> cation                         | -                    | -                             | -                                | 626.4 <sup>f</sup>                          |
| <b>6</b> cation                         | -                    | -                             | -                                | 664.4 <sup>f</sup>                          |
| <b>7</b> cation                         | -                    | -                             | -                                | 770.0 <sup>f</sup>                          |
| <b>8</b> cation                         | -                    | -                             | -                                | 826.0 <sup>f</sup>                          |
| <b>9</b> cation                         | -                    | -                             | -                                | 663.4 <sup>f</sup>                          |
| <b>10</b> cation                        | -                    | -                             | -                                | 667.4 <sup>f</sup>                          |
| <b>11</b> cation                        | -                    | -                             | -                                | 575.9 <sup>f</sup>                          |

[<sup>a</sup>] Total energy calculated by B3LYP/6-31+G\*\*//MP2/6-311++G\*\* method; [<sup>b</sup>] Zero-point correction; [<sup>c</sup>] Thermal correction to enthalpy; [<sup>d</sup>] Heat of formation (1 hartree = 2625.499748 kJ·mol<sup>-1</sup>). [<sup>e</sup>] Data are from Ref. [D. R. Lide, ed., *CRC Handbook of Chemistry and Physics, 88th Edition (Internet Version 2008)*, CRC Press/Taylor and Francis, Boca Raton, FL.]. [<sup>f</sup>] Data from Ref.[S7].

### 3. References

- [S1] V. G. Andrianov, V. G. Semenikhina, A. V. Ereemeev, *J. Heterocycl. Chem.*, 1994, **34**, 475.
- [S2] M. J. Frisch, G. W. Trucks, H. B. Schlegel, G. E. Scuseria, M. A. Robb, J. R. Cheeseman, G. Scalmani, V. Barone, B. Mennucci, G. A. Petersson, H. Nakatsuji, M. Caricato, X. Li, H. P. Hratchian, A. F. Izmaylov, J. Bloino, G. Zheng, J. L. Sonnenberg, M. Hada, M. Ehara, K. Toyota, R. Fukuda, J. Hasegawa, M. Ishida, T. Nakajima, Y. Honda, O. Kitao, H. Nakai, T. Vreven, J. A. Montgomery, Jr., J. E. Peralta, F. Ogliaro, M. Bearpark, J. J. Heyd, E. Brothers, K. N. Kudin, V. N. Staroverov, R. Kobayashi, J. Normand, K. Raghavachari, A. Rendell, J. C. Burant, S. S. Iyengar, J. Tomasi, M. Cossi, N. Rega, J. M. Millam, M. Klene, J. E. Knox, J. B. Cross, V. Bakken, C. Adamo, J. Jaramillo, R. Gomperts, R. E. Stratmann, O. Yazyev, A. J. Austin, R. Cammi, C. Pomelli, J. W. Ochterski, R. L. Martin, K. Morokuma, V. G. Zakrzewski, G. A. Voth, P. Salvador, J. J. Dannenberg, S. Dapprich, A. D. Daniels, Ö. Farkas, J. B. Foresman, J. V. Ortiz, J. Cioslowski, D. J. Fox, Gaussian 09, Revision B.01, Gaussian, Inc., Wallingford CT, 2009.
- [S3] P. J. Linstrom, W. G. Mallard, Eds., NIST Chemistry WebBook, NIST Standard Reference Database Number 69, June 2005, National Institute of Standards and Technology, Gaithersburg MD, 20899 (<http://webbook.nist.gov>).
- [S4] K. Wang, D. A. Parrish and J. M. Shreeve. *Chem. Eur. J.*, 2011, **17**, 14485-14492.
- [S5] H. Jenkins, D. Tudela and L. Glasser, *Inorg. Chem.* 2002, **41**, 2364–2367.
- [S6] B. Rice, J. Hare, E. Byrd, *J. Phys. Chem. A*, 2007, **111**, 10874.
- [S7] J. Tian, H. Xiong, Q. Lin, G. Cheng and H. Yang, *New J. Chem.*, 2017, **41**, 1918-1924.

## 4. Screening of Reaction Time for 3

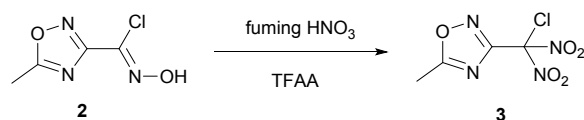

**Table S3** Screening of Reaction Time for 3.

| Entry <sup>a</sup> | Time (h) | Yield (%) of 3 |
|--------------------|----------|----------------|
| 1                  | 4        | 31.5           |
| <b>2</b>           | <b>8</b> | <b>43.1</b>    |
| 3                  | 10       | 41.0           |
| 4                  | 12       | 41.7           |
| 5                  | 16       | 38.6           |
| 6                  | 18       | 38.4           |
| 7                  | 24       | 38.6           |

<sup>[a]</sup> All Reactions was carried out in the same conditions except reaction time with the scale of 1mmol **2** and 0.8ml HNO<sub>3</sub>, 1.4ml TFAA.

## 5. X-ray Diffraction

**Table S4** Crystallographic data for 3, 4, 7.

| Compd.                                     | <b>3</b>                                                      | <b>4</b>                                                                      | <b>7</b>                                                    |
|--------------------------------------------|---------------------------------------------------------------|-------------------------------------------------------------------------------|-------------------------------------------------------------|
| Formula                                    | C <sub>4</sub> H <sub>3</sub> ClN <sub>4</sub> O <sub>5</sub> | C <sub>12</sub> H <sub>9</sub> K <sub>3</sub> N <sub>12</sub> O <sub>15</sub> | C <sub>4</sub> H <sub>8</sub> N <sub>6</sub> O <sub>5</sub> |
| Mw[g mol <sup>-1</sup> ]                   | 222.55                                                        | 678.61                                                                        | 220.16                                                      |
| T[K]                                       | 296(2)                                                        | 170                                                                           | 293(2)                                                      |
| Crystal size[mm <sup>3</sup> ]             | 0.700 × 0.40 × 0.300                                          | 0.230 × 0.160 × 0.070                                                         | 0.800 × 0.600 × 0.500                                       |
| Crystal system                             | Monoclinic                                                    | Orthorhombic                                                                  | Monoclinic                                                  |
| Space group                                | P2(1)/c                                                       | Pbca                                                                          | P2(1)/c                                                     |
| <i>a</i> [Å]                               | 8.898(3)                                                      | 7.9304(2)                                                                     | 8.2956(7)                                                   |
| <i>b</i> [Å]                               | 15.100(5)                                                     | 15.4465(5)                                                                    | 8.4968(7)                                                   |
| <i>c</i> [Å]                               | 6.171(2)                                                      | 39.4906(13)                                                                   | 12.4697(11)                                                 |
| <i>α</i> [°]                               | 90                                                            | 90                                                                            | 90                                                          |
| <i>β</i> [°]                               | 97.794(9)                                                     | 90                                                                            | 95.072(3)                                                   |
| <i>γ</i> [°]                               | 90                                                            | 90                                                                            | 90                                                          |
| <i>V</i> [Å <sup>3</sup> ]                 | 821.5(5)                                                      | 4837.5(3)                                                                     | 875.50(13)                                                  |
| <i>Z</i>                                   | 4                                                             | 8                                                                             | 4                                                           |
| $\rho_{\text{calc}}$ [g cm <sup>-3</sup> ] | 1.799                                                         | 1.864                                                                         | 1.670                                                       |

|                                     |                                                    |                                                     |                                                      |
|-------------------------------------|----------------------------------------------------|-----------------------------------------------------|------------------------------------------------------|
| $\mu$ [mm <sup>-1</sup> ]           | 0.471                                              | 0.664                                               | 0.151                                                |
| $F$ [000]                           | 448                                                | 2736                                                | 456                                                  |
| $\theta$ range[°]                   | 2.310-28.294                                       | 2.637-27.111                                        | 2.465-28.451                                         |
| Reflections collected               | 9114 / 2032                                        | 72661 / 5335                                        | 10429 / 2190                                         |
| Index ranges                        | -11<= $h$ <=11,<br>-19<= $k$ <=20,<br>-8<= $l$ <=8 | -10<= $h$ <=9,<br>-19<= $k$ <=19,<br>-50<= $l$ <=50 | -11<= $h$ <=11,<br>-11<= $k$ <=11,<br>-16<= $l$ <=16 |
| $R_{\text{int}}$                    | 0.0281                                             | 0.0447                                              | 0.0302                                               |
| Data/restraints/parameters          | 2032 / 0 / 128                                     | 5335 / 0 / 382                                      | 2190 / 0 / 137                                       |
| Final $R$ index[ $I > 2\sigma(I)$ ] | $R_1 = 0.0293$ ,<br>$wR_2 = 0.0888$                | $R_1 = 0.0275$<br>$wR_2 = 0.0636$                   | $R_1 = 0.0984$<br>$wR_2 = 0.2562$                    |
| Final $R$ index[all data]           | $R_1 = 0.0311$ ,<br>$wR_2 = 0.0905$                | $R_1 = 0.0342$<br>$wR_2 = 0.0677$                   | $R_1 = 0.1019$<br>$wR_2 = 0.2576$                    |
| GOF on $F^2$                        | 1.066                                              | 1.079                                               | 1.275                                                |
| CCDC                                | 2018730                                            | 2038764                                             | 2018495                                              |

$$R_1 = \frac{\sum ||F_o| - |F_c||}{\sum |F_o|}, wR_2 = \left[ \frac{w(F_o^2 - F_c^2)^2}{w(F_o^2)^2} \right]^{1/2}.$$

**Table S5.** Displacement parameters ( $\text{Å}^2 \times 10^3$ ) for **3**. U(eq) is defined as one third of the trace of the orthogonalized Uij tensor.

|       | x       | y       | z        | U(eq) |
|-------|---------|---------|----------|-------|
| Cl(1) | 7054(1) | 5943(1) | 12203(1) | 24(1) |
| O(2)  | 9664(1) | 6387(1) | 9990(2)  | 30(1) |
| O(5)  | 5289(1) | 7096(1) | 9013(2)  | 26(1) |
| N(3)  | 5685(1) | 6418(1) | 8209(2)  | 18(1) |
| O(4)  | 5111(1) | 6058(1) | 6536(2)  | 27(1) |
| N(2)  | 8018(1) | 4922(1) | 6690(2)  | 18(1) |
| C(3)  | 7108(1) | 5948(1) | 9424(2)  | 15(1) |
| O(3)  | 8221(1) | 7002(1) | 7294(2)  | 30(1) |
| O(1)  | 7137(1) | 3675(1) | 7904(2)  | 22(1) |
| C(2)  | 7291(1) | 5048(1) | 8481(2)  | 15(1) |
| N(4)  | 8461(1) | 6513(1) | 8861(2)  | 18(1) |
| N(1)  | 6749(1) | 4342(1) | 9312(2)  | 21(1) |
| C(1)  | 7890(2) | 4065(1) | 6415(2)  | 19(1) |
| C(4)  | 8478(2) | 3500(1) | 4763(3)  | 31(1) |



**Table S6.** Bond lengths [Å] and angles [deg] for **3**.

---

|                 |            |
|-----------------|------------|
| Cl(1)-C(3)      | 1.7219(14) |
| O(2)-N(4)       | 1.2103(16) |
| O(5)-N(3)       | 1.2102(15) |
| N(3)-O(4)       | 1.2166(16) |
| N(3)-C(3)       | 1.5523(16) |
| N(2)-C(1)       | 1.3077(18) |
| N(2)-C(2)       | 1.3675(16) |
| C(3)-C(2)       | 1.4967(17) |
| C(3)-N(4)       | 1.5530(16) |
| O(3)-N(4)       | 1.2117(16) |
| O(1)-C(1)       | 1.3443(17) |
| O(1)-N(1)       | 1.4043(15) |
| C(2)-N(1)       | 1.3027(17) |
| C(1)-C(4)       | 1.4786(19) |
|                 |            |
| O(5)-N(3)-O(4)  | 127.82(12) |
| O(5)-N(3)-C(3)  | 116.89(11) |
| O(4)-N(3)-C(3)  | 115.28(10) |
| C(1)-N(2)-C(2)  | 101.53(11) |
| C(2)-C(3)-N(3)  | 110.60(10) |
| C(2)-C(3)-N(4)  | 106.46(10) |
| N(3)-C(3)-N(4)  | 104.30(9)  |
| C(2)-C(3)-Cl(1) | 113.72(9)  |
| N(3)-C(3)-Cl(1) | 110.62(8)  |
| N(4)-C(3)-Cl(1) | 110.64(8)  |
| C(1)-O(1)-N(1)  | 107.20(10) |
| N(1)-C(2)-N(2)  | 116.47(11) |
| N(1)-C(2)-C(3)  | 121.59(11) |
| N(2)-C(2)-C(3)  | 121.93(11) |
| O(2)-N(4)-O(3)  | 126.98(12) |
| O(2)-N(4)-C(3)  | 115.90(11) |
| O(3)-N(4)-C(3)  | 117.05(11) |
| C(2)-N(1)-O(1)  | 101.98(10) |
| N(2)-C(1)-O(1)  | 112.81(12) |
| N(2)-C(1)-C(4)  | 128.88(14) |
| O(1)-C(1)-C(4)  | 118.30(13) |

---

**Table S7.** Anisotropic displacement parameters ( $\text{Å}^2 \times 10^3$ ) for **3**. The anisotropic displacement factor exponent takes the form:  $-2 \pi^2 [h^2 a^{*2} U_{11} + \dots + 2 h k a^* b^* U_{12}]$ .

|       | U11   | U22   | U33   | U23   | U13   | U12   |
|-------|-------|-------|-------|-------|-------|-------|
| Cl(1) | 34(1) | 26(1) | 12(1) | 0(1)  | 5(1)  | -4(1) |
| O(2)  | 18(1) | 37(1) | 34(1) | -2(1) | -3(1) | -4(1) |
| O(5)  | 26(1) | 19(1) | 34(1) | -1(1) | 9(1)  | 5(1)  |
| N(3)  | 16(1) | 18(1) | 19(1) | 3(1)  | 5(1)  | 1(1)  |
| O(4)  | 24(1) | 33(1) | 21(1) | -2(1) | -4(1) | 5(1)  |
| N(2)  | 21(1) | 19(1) | 16(1) | 1(1)  | 4(1)  | 2(1)  |
| C(3)  | 16(1) | 16(1) | 13(1) | 2(1)  | 3(1)  | -1(1) |
| O(3)  | 27(1) | 26(1) | 38(1) | 15(1) | 12(1) | 1(1)  |
| O(1)  | 24(1) | 16(1) | 27(1) | -1(1) | 3(1)  | -1(1) |
| C(2)  | 15(1) | 16(1) | 14(1) | 1(1)  | 1(1)  | 0(1)  |
| N(4)  | 17(1) | 16(1) | 23(1) | -1(1) | 5(1)  | -2(1) |
| N(1)  | 24(1) | 16(1) | 23(1) | 0(1)  | 6(1)  | -2(1) |
| C(1)  | 19(1) | 20(1) | 19(1) | 0(1)  | -1(1) | 4(1)  |
| C(4)  | 34(1) | 29(1) | 29(1) | -9(1) | 3(1)  | 11(1) |

**Table S8.** Hydrogen coordinates ( $\times 10^4$ ) and isotropic displacement parameters ( $\text{Å}^2 \times 10^3$ ) for **3**.

|       | x    | y    | z    | U(eq) |
|-------|------|------|------|-------|
| H(4A) | 8505 | 3834 | 3445 | 46    |
| H(4B) | 7827 | 2996 | 4457 | 46    |
| H(4C) | 9483 | 3304 | 5316 | 46    |

**Table S9.** Displacement parameters ( $\text{Å}^2 \times 10^3$ ) for **4**. U(eq) is defined as one third of the trace of the orthogonalized  $U_{ij}$  tensor.

|    | x          | y         | z         | U(eq)    |
|----|------------|-----------|-----------|----------|
| K1 | 1603.6(5)  | 1394.0(2) | 4314.6(2) | 22.44(8) |
| K2 | 4099.9(4)  | 3721.1(2) | 3789.0(2) | 19.04(8) |
| K3 | 8956.5(4)  | 4016.9(2) | 2236.6(2) | 21.16(8) |
| O1 | -225.1(15) | 2117.3(7) | 2459.5(3) | 25.0(2)  |
| O2 | 2848.3(14) | 2611.9(7) | 3232.8(3) | 24.1(2)  |
| O3 | 3004.3(14) | 1859.8(7) | 3695.7(3) | 23.4(2)  |

|     |             |            |           |         |
|-----|-------------|------------|-----------|---------|
| O4  | 936.4(15)   | 539.5(7)   | 3730.7(3) | 23.8(2) |
| O5  | -280.3(14)  | 194.8(7)   | 3255.7(3) | 22.7(2) |
| O6  | 385.2(15)   | 4102.5(9)  | 5598.7(3) | 32.9(3) |
| O7  | 2166(2)     | 2446.5(8)  | 4855.2(3) | 42.4(4) |
| O8  | 3568.3(17)  | 2917.8(8)  | 4418.2(3) | 29.3(3) |
| O9  | 3738.0(18)  | 4607.4(7)  | 4387.7(3) | 30.3(3) |
| O10 | 3353.2(15)  | 5267.6(7)  | 4866.2(3) | 25.8(3) |
| O11 | 9907.7(16)  | 3211.9(9)  | 4161.4(3) | 34.2(3) |
| O12 | 6481.5(14)  | 3228.6(7)  | 3293.4(3) | 23.2(2) |
| O13 | 7368.5(14)  | 3876.8(8)  | 2839.2(3) | 24.5(3) |
| O14 | 11640.7(14) | 4439.6(8)  | 3338.5(3) | 24.1(2) |
| O15 | 10542.7(13) | 4242.8(8)  | 2841.6(3) | 21.8(2) |
| N1  | 1339.9(17)  | 1033.8(8)  | 2643.3(3) | 20.0(3) |
| N2  | -187.4(19)  | 2192.3(9)  | 2817.1(3) | 25.5(3) |
| N3  | 2401.7(16)  | 1976.8(8)  | 3407.8(3) | 17.8(3) |
| N4  | 637.8(16)   | 696.6(8)   | 3427.1(3) | 17.8(3) |
| N5  | 2996.0(18)  | 3691.7(9)  | 5494.0(3) | 23.3(3) |
| N6  | 590.3(19)   | 4140.1(11) | 5242.2(4) | 33.4(4) |
| N7  | 2880.3(19)  | 3049.9(9)  | 4698.8(3) | 26.8(3) |
| N8  | 3349.0(17)  | 4589.9(8)  | 4694.2(3) | 20.9(3) |
| N9  | 7889.0(16)  | 3929.7(9)  | 3903.8(3) | 20.8(3) |
| N10 | 10324(2)    | 3213.9(11) | 3812.8(4) | 35.9(4) |
| N11 | 7599.4(16)  | 3641.5(8)  | 3136.8(3) | 17.5(3) |
| N12 | 10444.6(15) | 4182.7(8)  | 3154.9(3) | 16.8(3) |
| C1  | 868(2)      | 1188.5(11) | 2018.0(4) | 25.2(4) |
| C2  | 704.8(19)   | 1415.3(10) | 2381.6(4) | 19.4(3) |
| C3  | 767.4(19)   | 1549.6(10) | 2906.6(4) | 17.7(3) |
| C4  | 1241(2)     | 1417.4(10) | 3262.3(4) | 18.3(3) |
| C5  | 1994(2)     | 3741.4(13) | 6098.7(4) | 33.2(4) |
| C6  | 1866(2)     | 3829.1(11) | 5725.0(4) | 23.4(3) |
| C7  | 2141(2)     | 3894.4(10) | 5199.4(4) | 21.7(3) |
| C8  | 2865(2)     | 3841.4(10) | 4857.7(4) | 22.8(3) |
| C9  | 7742(2)     | 3748.2(13) | 4533.8(4) | 32.5(4) |
| C10 | 8455(2)     | 3647.4(10) | 4190.8(4) | 20.3(3) |
| C11 | 9097.1(19)  | 3650.6(10) | 3677.6(4) | 17.6(3) |
| C12 | 9050.0(18)  | 3837.4(10) | 3314.7(4) | 17.1(3) |

**Table S10.** Bond lengths [Å] and angles [deg] for **4**.

|       |            |       |            |
|-------|------------|-------|------------|
| K1 K2 | 4.5986(5)  | O2 N3 | 1.2511(16) |
| K1 O3 | 2.7793(11) | O3 N3 | 1.2467(16) |

|                     |            |         |            |
|---------------------|------------|---------|------------|
| K1 O4               | 2.7093(11) | O4 N4   | 1.2458(16) |
| K1 O6 <sup>1</sup>  | 3.1143(13) | O5 N4   | 1.2606(16) |
| K1 O7               | 2.7202(13) | O6 N6   | 1.4183(18) |
| K1 O8               | 2.8522(13) | O6 C6   | 1.344(2)   |
| K1 O9 <sup>2</sup>  | 2.7879(12) | O7 N7   | 1.2533(18) |
| K1 O10 <sup>2</sup> | 2.7881(12) | O8 N7   | 1.2521(18) |
| K1 O11 <sup>3</sup> | 3.1717(13) | O9 N8   | 1.2493(16) |
| K1 N5 <sup>4</sup>  | 2.9621(14) | O10 N8  | 1.2481(16) |
| K1 N7               | 3.1416(14) | O11 N10 | 1.4154(17) |
| K1 N8 <sup>2</sup>  | 3.1645(13) | O11 C10 | 1.339(2)   |
| K2 O2               | 2.9574(11) | O12 N11 | 1.2552(16) |
| K2 O3               | 3.0259(12) | O13 N11 | 1.2435(16) |
| K2 O4 <sup>5</sup>  | 2.8183(12) | O14 N12 | 1.2582(16) |
| K2 O5 <sup>5</sup>  | 3.2396(12) | O15 N12 | 1.2433(16) |
| K2 O8               | 2.8090(12) | N1 C2   | 1.292(2)   |
| K2 O9               | 2.7470(11) | N1 C3   | 1.387(2)   |
| K2 O12              | 2.8242(11) | N2 C3   | 1.298(2)   |
| K2 O14 <sup>3</sup> | 2.8637(11) | N3 C4   | 1.3870(19) |
| K2 N3               | 3.3674(13) | N4 C4   | 1.376(2)   |
| K2 N4 <sup>5</sup>  | 3.3759(13) | N5 C6   | 1.296(2)   |
| K2 N9               | 3.0559(14) | N5 C7   | 1.383(2)   |
| K2 N10 <sup>3</sup> | 3.0966(17) | N6 C7   | 1.298(2)   |
| K3 O1 <sup>6</sup>  | 3.1314(11) | N7 C8   | 1.374(2)   |
| K3 O2 <sup>7</sup>  | 2.9862(11) | N8 C8   | 1.379(2)   |
| K3 O5 <sup>8</sup>  | 2.8621(11) | N9 C10  | 1.295(2)   |
| K3 O12 <sup>7</sup> | 3.1421(12) | N9 C11  | 1.3790(19) |
| K3 O13              | 2.7013(11) | N10 C11 | 1.299(2)   |
| K3 O13 <sup>7</sup> | 2.7309(11) | N11 C12 | 1.3815(19) |
| K3 O14 <sup>9</sup> | 2.9928(12) | N12 C12 | 1.3805(19) |
| K3 O15 <sup>9</sup> | 2.7471(11) | C1 C2   | 1.483(2)   |
| K3 O15              | 2.7226(11) | C3 C4   | 1.468(2)   |
| K3 N1 <sup>8</sup>  | 3.1601(13) | C5 C6   | 1.486(2)   |
| K3 N11 <sup>7</sup> | 3.2949(13) | C7 C8   | 1.469(2)   |
| K3 N12 <sup>9</sup> | 3.1957(13) | C9 C10  | 1.476(2)   |
| O1 N2               | 1.4171(16) | C11 C12 | 1.462(2)   |
| O1 C2               | 1.3470(19) |         |            |

|                        |           |                                      |           |
|------------------------|-----------|--------------------------------------|-----------|
| O3 K1 K2               | 39.53(2)  | O13 K3 O12 <sup>7</sup>              | 148.53(3) |
| O3 K1 O6 <sup>1</sup>  | 77.03(3)  | O13 <sup>7</sup> K3 O12 <sup>7</sup> | 42.68(3)  |
| O3 K1 O8               | 72.19(3)  | O13 K3 O13 <sup>7</sup>              | 123.52(3) |
| O3 K1 O9 <sup>2</sup>  | 112.71(4) | O13 <sup>7</sup> K3 O14 <sup>9</sup> | 122.83(3) |
| O3 K1 O10 <sup>2</sup> | 147.53(4) | O13 K3 O14 <sup>9</sup>              | 113.58(3) |
| O3 K1 O11 <sup>3</sup> | 76.85(3)  | O13 K3 O15 <sup>9</sup>              | 69.49(3)  |

|                  |                     |           |                                      |            |
|------------------|---------------------|-----------|--------------------------------------|------------|
| O3               | K1 N5 <sup>4</sup>  | 128.46(4) | O13 K3 O15                           | 56.80(3)   |
| O3               | K1 N7               | 94.88(4)  | O13 <sup>7</sup> K3 O15 <sup>9</sup> | 166.96(3)  |
| O3               | K1 N8 <sup>2</sup>  | 129.77(4) | O13 <sup>7</sup> K3 N1 <sup>8</sup>  | 99.69(4)   |
| O4               | K1 K2               | 94.63(3)  | O13 K3 N1 <sup>8</sup>               | 84.95(4)   |
| O4               | K1 O3               | 57.02(3)  | O13 <sup>7</sup> K3 N11 <sup>7</sup> | 21.29(3)   |
| O4               | K1 O6 <sup>1</sup>  | 99.31(4)  | O13 K3 N11 <sup>7</sup>              | 142.09(3)  |
| O4               | K1 O7               | 172.40(4) | O13 K3 N12 <sup>9</sup>              | 91.51(3)   |
| O4               | K1 O8               | 129.11(4) | O13 <sup>7</sup> K3 N12 <sup>9</sup> | 144.77(3)  |
| O4               | K1 O9 <sup>2</sup>  | 65.59(3)  | O14 <sup>9</sup> K3 O1 <sup>6</sup>  | 123.02(3)  |
| O4               | K1 O10 <sup>2</sup> | 111.31(3) | O14 <sup>9</sup> K3 O12 <sup>7</sup> | 88.29(3)   |
| O4               | K1 O11 <sup>3</sup> | 100.72(3) | O14 <sup>9</sup> K3 N1 <sup>8</sup>  | 81.56(3)   |
| O4               | K1 N5 <sup>4</sup>  | 90.38(4)  | O14 <sup>9</sup> K3 N11 <sup>7</sup> | 103.70(3)  |
| O4               | K1 N7               | 150.54(4) | O14 <sup>9</sup> K3 N12 <sup>9</sup> | 23.16(3)   |
| O4               | K1 N8 <sup>2</sup>  | 88.65(3)  | O15 <sup>9</sup> K3 O1 <sup>6</sup>  | 110.79(3)  |
| O6 <sup>1</sup>  | K1 K2               | 80.07(3)  | O15 K3 O1 <sup>6</sup>               | 77.15(3)   |
| O6 <sup>1</sup>  | K1 O11 <sup>3</sup> | 130.34(4) | O15 <sup>9</sup> K3 O2 <sup>7</sup>  | 74.49(3)   |
| O6 <sup>1</sup>  | K1 N7               | 80.62(4)  | O15 K3 O2 <sup>7</sup>               | 140.70(4)  |
| O6 <sup>1</sup>  | K1 N8 <sup>2</sup>  | 73.72(4)  | O15 K3 O5 <sup>8</sup>               | 110.19(3)  |
| O7               | K1 K2               | 79.42(3)  | O15 <sup>9</sup> K3 O5 <sup>8</sup>  | 101.80(3)  |
| O7               | K1 O3               | 118.02(4) | O15 K3 O12 <sup>7</sup>              | 109.86(3)  |
| O7               | K1 O6 <sup>1</sup>  | 84.43(4)  | O15 <sup>9</sup> K3 O12 <sup>7</sup> | 127.05(3)  |
| O7               | K1 O8               | 45.94(4)  | O15 K3 O13 <sup>7</sup>              | 69.43(3)   |
| O7               | K1 O9 <sup>2</sup>  | 121.76(4) | O15 <sup>9</sup> K3 O14 <sup>9</sup> | 44.13(3)   |
| O7               | K1 O10 <sup>2</sup> | 75.98(4)  | O15 K3 O14 <sup>9</sup>              | 157.14(4)  |
| O7               | K1 O11 <sup>3</sup> | 71.95(4)  | O15 K3 O15 <sup>9</sup>              | 122.52(3)  |
| O7               | K1 N5 <sup>4</sup>  | 89.14(4)  | O15 <sup>9</sup> K3 N1 <sup>8</sup>  | 79.53(4)   |
| O7               | K1 N7               | 23.29(4)  | O15 K3 N1 <sup>8</sup>               | 77.07(4)   |
| O7               | K1 N8 <sup>2</sup>  | 98.78(4)  | O15 <sup>9</sup> K3 N11 <sup>7</sup> | 146.74(3)  |
| O8               | K1 K2               | 35.37(2)  | O15 K3 N11 <sup>7</sup>              | 90.58(3)   |
| O8               | K1 O6 <sup>1</sup>  | 70.21(4)  | O15 K3 N12 <sup>9</sup>              | 144.78(3)  |
| O8               | K1 O11 <sup>3</sup> | 61.86(4)  | O15 <sup>9</sup> K3 N12 <sup>9</sup> | 22.57(3)   |
| O8               | K1 N5 <sup>4</sup>  | 121.87(4) | N1 <sup>8</sup> K3 N11 <sup>7</sup>  | 107.81(3)  |
| O8               | K1 N7               | 23.48(3)  | N1 <sup>8</sup> K3 N12 <sup>9</sup>  | 85.92(3)   |
| O8               | K1 N8 <sup>2</sup>  | 130.72(4) | N12 <sup>9</sup> K3 N11 <sup>7</sup> | 124.18(3)  |
| O9 <sup>2</sup>  | K1 K2               | 149.57(3) | N2 O1 K3 <sup>3</sup>                | 102.00(8)  |
| O9 <sup>2</sup>  | K1 O6 <sup>1</sup>  | 80.70(4)  | C2 O1 K3 <sup>3</sup>                | 143.47(9)  |
| O9 <sup>2</sup>  | K1 O8               | 148.78(4) | C2 O1 N2                             | 106.38(11) |
| O9 <sup>2</sup>  | K1 O10 <sup>2</sup> | 45.79(3)  | K2 O2 K3 <sup>9</sup>                | 86.63(3)   |
| O9 <sup>2</sup>  | K1 O11 <sup>3</sup> | 148.75(4) | N3 O2 K2                             | 97.99(8)   |
| O9 <sup>2</sup>  | K1 N5 <sup>4</sup>  | 80.53(4)  | N3 O2 K3 <sup>9</sup>                | 174.84(9)  |
| O9 <sup>2</sup>  | K1 N7               | 141.93(4) | K1 O3 K2                             | 104.69(4)  |
| O9 <sup>2</sup>  | K1 N8 <sup>2</sup>  | 23.14(3)  | N3 O3 K1                             | 133.35(9)  |
| O10 <sup>2</sup> | K1 K2               | 146.63(3) | N3 O3 K2                             | 94.78(8)   |

|                                     |           |                                     |            |
|-------------------------------------|-----------|-------------------------------------|------------|
| O10 <sup>2</sup> K1O6 <sup>1</sup>  | 75.44(3)  | K1 O4 K2 <sup>2</sup>               | 114.71(4)  |
| O10 <sup>2</sup> K1O8               | 113.34(3) | N4 O4 K1                            | 139.58(9)  |
| O10 <sup>2</sup> K1O11 <sup>3</sup> | 134.97(3) | N4 O4 K2 <sup>2</sup>               | 105.71(8)  |
| O10 <sup>2</sup> K1N5 <sup>4</sup>  | 77.56(4)  | K3 <sup>10</sup> O5 K2 <sup>2</sup> | 83.62(3)   |
| O10 <sup>2</sup> K1N7               | 97.28(3)  | N4 O5 K2 <sup>2</sup>               | 85.18(8)   |
| O10 <sup>2</sup> K1N8 <sup>2</sup>  | 23.11(3)  | N4 O5 K3 <sup>10</sup>              | 122.94(9)  |
| O11 <sup>3</sup> K1K2               | 53.45(2)  | N6 O6 K1 <sup>4</sup>               | 103.28(9)  |
| N5 <sup>4</sup> K1K2                | 124.46(3) | C6 O6 K1 <sup>4</sup>               | 136.32(10) |
| N5 <sup>4</sup> K1O6 <sup>1</sup>   | 153.00(4) | C6 O6 N6                            | 106.32(13) |
| N5 <sup>4</sup> K1O11 <sup>3</sup>  | 71.26(4)  | N7 O7 K1                            | 97.58(9)   |
| N5 <sup>4</sup> K1N7                | 102.97(4) | K2 O8 K1                            | 108.64(4)  |
| N5 <sup>4</sup> K1N8 <sup>2</sup>   | 81.45(4)  | N7 O8 K1                            | 91.34(9)   |
| N7 K1K2                             | 56.14(3)  | N7 O8 K2                            | 140.93(10) |
| N7 K1O11 <sup>3</sup>               | 60.53(4)  | K2 O9 K1 <sup>5</sup>               | 114.48(4)  |
| N7 K1N8 <sup>2</sup>                | 118.97(3) | N8 O9 K1 <sup>5</sup>               | 95.61(8)   |
| N8 <sup>2</sup> K1K2                | 153.77(3) | N8 O9 K2                            | 148.08(10) |
| N8 <sup>2</sup> K1O11 <sup>3</sup>  | 151.05(4) | N8 O10K1 <sup>5</sup>               | 95.62(8)   |
| O2 K2O3                             | 42.50(3)  | N10 O11K1 <sup>6</sup>              | 95.08(9)   |
| O2 K2O5 <sup>5</sup>                | 91.21(3)  | C10 O11K1 <sup>6</sup>              | 142.47(10) |
| O2 K2N3                             | 21.59(3)  | C10 O11N10                          | 106.50(12) |
| O2 K2N4 <sup>5</sup>                | 103.29(3) | K2 O12K3 <sup>9</sup>               | 86.05(3)   |
| O2 K2N9                             | 120.08(3) | N11 O12K2                           | 132.61(9)  |
| O2 K2N10 <sup>3</sup>               | 63.35(4)  | N11 O12K3 <sup>9</sup>              | 85.69(8)   |
| O3 K2O5 <sup>5</sup>                | 132.18(3) | K3 O13K3 <sup>9</sup>               | 111.04(4)  |
| O3 K2N3                             | 21.65(3)  | N11 O13K3 <sup>9</sup>              | 105.82(8)  |
| O3 K2N4 <sup>5</sup>                | 145.58(3) | N11 O13K3                           | 141.93(9)  |
| O3 K2N9                             | 113.61(3) | K2 <sup>6</sup> O14K3 <sup>7</sup>  | 88.22(3)   |
| O3 K2N10 <sup>3</sup>               | 59.05(4)  | N12 O14K2 <sup>6</sup>              | 138.53(9)  |
| O4 <sup>5</sup> K2O2                | 120.88(3) | N12 O14K3 <sup>7</sup>              | 87.50(8)   |
| O4 <sup>5</sup> K2O3                | 159.07(3) | K3 O15K3 <sup>7</sup>               | 109.90(4)  |
| O4 <sup>5</sup> K2O5 <sup>5</sup>   | 41.36(3)  | N12 O15K3 <sup>7</sup>              | 99.44(8)   |
| O4 <sup>5</sup> K2O12               | 102.63(3) | N12 O15K3                           | 146.61(9)  |
| O4 <sup>5</sup> K2O14 <sup>3</sup>  | 63.64(3)  | C2 N1 K3 <sup>10</sup>              | 122.74(10) |
| O4 <sup>5</sup> K2N3                | 139.18(3) | C2 N1 C3                            | 102.14(13) |
| O4 <sup>5</sup> K2N4 <sup>5</sup>   | 20.81(3)  | C3 N1 K3 <sup>10</sup>              | 115.44(9)  |
| O4 <sup>5</sup> K2N9                | 85.24(4)  | C3 N2 O1                            | 102.78(12) |
| O4 <sup>5</sup> K2N10 <sup>3</sup>  | 104.17(4) | O2 N3 K2                            | 60.42(7)   |
| O5 <sup>5</sup> K2N3                | 112.77(3) | O2 N3 C4                            | 116.58(12) |
| O5 <sup>5</sup> K2N4 <sup>5</sup>   | 21.85(3)  | O3 N3 K2                            | 63.57(7)   |
| O8 K2O2                             | 110.53(3) | O3 N3 O2                            | 120.60(12) |
| O8 K2O3                             | 69.20(3)  | O3 N3 C4                            | 122.81(13) |
| O8 K2O4 <sup>5</sup>                | 120.73(3) | C4 N3 K2                            | 161.62(10) |
| O8 K2O5 <sup>5</sup>                | 158.25(3) | O4 N4 K2 <sup>2</sup>               | 53.48(7)   |

|                                      |           |                         |            |
|--------------------------------------|-----------|-------------------------|------------|
| O8 K2 O12                            | 126.47(4) | O4 N4 O5                | 120.45(13) |
| O8 K2 O14 <sup>3</sup>               | 128.21(4) | O4 N4 C4                | 123.15(13) |
| O8 K2 N3                             | 88.97(3)  | O5 N4 K2 <sup>2</sup>   | 72.98(8)   |
| O8 K2 N4 <sup>5</sup>                | 141.53(3) | O5 N4 C4                | 116.38(12) |
| O8 K2 N9                             | 93.61(4)  | C4 N4 K2 <sup>2</sup>   | 155.58(10) |
| O8 K2 N10 <sup>3</sup>               | 73.52(4)  | C6 N5 K1 <sup>1</sup>   | 119.71(11) |
| O9 K2 O2                             | 153.24(4) | C6 N5 C7                | 102.48(14) |
| O9 K2 O3                             | 123.25(3) | C7 N5 K1 <sup>1</sup>   | 134.30(10) |
| O9 K2 O4 <sup>5</sup>                | 64.70(3)  | C7 N6 O6                | 103.06(13) |
| O9 K2 O5 <sup>5</sup>                | 103.86(3) | O7 N7 K1                | 59.12(8)   |
| O9 K2 O8                             | 56.17(3)  | O7 N7 C8                | 115.64(14) |
| O9 K2 O12                            | 143.18(4) | O8 N7 K1                | 65.18(8)   |
| O9 K2 O14 <sup>3</sup>               | 105.69(4) | O8 N7 O7                | 120.78(14) |
| O9 K2 N3                             | 137.88(4) | O8 N7 C8                | 123.57(14) |
| O9 K2 N4 <sup>5</sup>                | 85.43(3)  | C8 N7 K1                | 160.37(12) |
| O9 K2 N9                             | 85.56(4)  | O9 N8 K1 <sup>5</sup>   | 61.25(8)   |
| O9 K2 N10 <sup>3</sup>               | 89.94(4)  | O9 N8 C8                | 122.73(13) |
| O12 K2 O2                            | 63.49(3)  | O10 N8 K1 <sup>5</sup>  | 61.27(7)   |
| O12 K2 O3                            | 81.47(3)  | O10 N8 O9               | 120.57(13) |
| O12 K2 O5 <sup>5</sup>               | 62.96(3)  | O10 N8 C8               | 116.68(13) |
| O12 K2 O14 <sup>3</sup>              | 97.43(3)  | C8 N8 K1 <sup>5</sup>   | 164.48(11) |
| O12 K2 N3                            | 75.06(3)  | C10 N9 K2               | 115.80(10) |
| O12 K2 N4 <sup>5</sup>               | 84.77(3)  | C10 N9 C11              | 102.77(13) |
| O12 K2 N9                            | 58.23(3)  | C11 N9 K2               | 123.65(10) |
| O12 K2 N10 <sup>3</sup>              | 126.84(4) | O11 N10 K2 <sup>6</sup> | 104.81(10) |
| O14 <sup>3</sup> K2 O2               | 62.26(3)  | C11 N10 K2 <sup>6</sup> | 125.48(12) |
| O14 <sup>3</sup> K2 O3               | 95.57(3)  | C11 N10 O11             | 103.08(13) |
| O14 <sup>3</sup> K2 O5 <sup>5</sup>  | 61.35(3)  | O12 N11 K3 <sup>9</sup> | 71.98(8)   |
| O14 <sup>3</sup> K2 N3               | 76.11(3)  | O12 N11 C12             | 116.66(12) |
| O14 <sup>3</sup> K2 N4 <sup>5</sup>  | 55.15(3)  | O13 N11 K3 <sup>9</sup> | 52.88(7)   |
| O14 <sup>3</sup> K2 N9               | 136.13(4) | O13 N11 O12             | 120.68(13) |
| O14 <sup>3</sup> K2 N10 <sup>3</sup> | 57.20(4)  | O13 N11 C12             | 122.63(13) |
| N3 K2 N4 <sup>5</sup>                | 123.95(3) | C12 N11 K3 <sup>9</sup> | 156.81(10) |
| N9 K2 O5 <sup>5</sup>                | 74.82(3)  | O14 N12 K3 <sup>7</sup> | 69.33(7)   |
| N9 K2 N3                             | 122.95(3) | O14 N12 C12             | 117.55(12) |
| N9 K2 N4 <sup>5</sup>                | 84.66(3)  | O15 N12 K3 <sup>7</sup> | 57.99(7)   |
| N9 K2 N10 <sup>3</sup>               | 166.66(4) | O15 N12 O14             | 120.19(12) |
| N10 <sup>3</sup> K2 O5 <sup>5</sup>  | 118.48(4) | O15 N12 C12             | 122.26(12) |
| N10 <sup>3</sup> K2 N3               | 54.86(4)  | C12 N12 K3 <sup>7</sup> | 152.67(10) |
| N10 <sup>3</sup> K2 N4 <sup>5</sup>  | 107.52(4) | O1 C2 C1                | 117.33(13) |
| O1 <sup>6</sup> K3 O12 <sup>7</sup>  | 72.07(3)  | N1 C2 O1                | 113.44(13) |
| O1 <sup>6</sup> K3 N1 <sup>8</sup>   | 153.76(3) | N1 C2 C1                | 129.23(15) |
| O1 <sup>6</sup> K3 N11 <sup>7</sup>  | 77.24(3)  | N1 C3 C4                | 123.63(13) |

|                                      |           |             |            |
|--------------------------------------|-----------|-------------|------------|
| O1 <sup>6</sup> K3 N12 <sup>9</sup>  | 113.07(3) | N2 C3 N1    | 115.24(13) |
| O2 <sup>7</sup> K3 O1 <sup>6</sup>   | 63.55(3)  | N2 C3 C4    | 121.08(14) |
| O2 <sup>7</sup> K3 O12 <sup>7</sup>  | 59.50(3)  | N3 C4 C3    | 118.65(13) |
| O2 <sup>7</sup> K3 O14 <sup>9</sup>  | 60.46(3)  | N4 C4 N3    | 122.61(13) |
| O2 <sup>7</sup> K3 N1 <sup>8</sup>   | 141.98(3) | N4 C4 C3    | 118.44(13) |
| O2 <sup>7</sup> K3 N11 <sup>7</sup>  | 81.51(3)  | O6 C6 C5    | 117.20(15) |
| O2 <sup>7</sup> K3 N12 <sup>9</sup>  | 60.10(3)  | N5 C6 O6    | 113.23(14) |
| O5 <sup>8</sup> K3 O1 <sup>6</sup>   | 135.28(3) | N5 C6 C5    | 129.56(16) |
| O5 <sup>8</sup> K3 O2 <sup>7</sup>   | 98.53(3)  | N5 C7 C8    | 124.69(15) |
| O5 <sup>8</sup> K3 O12 <sup>7</sup>  | 63.91(3)  | N6 C7 N5    | 114.91(14) |
| O5 <sup>8</sup> K3 O14 <sup>9</sup>  | 64.60(3)  | N6 C7 C8    | 120.41(15) |
| O5 <sup>8</sup> K3 N1 <sup>8</sup>   | 60.17(3)  | N7 C8 N8    | 121.99(14) |
| O5 <sup>8</sup> K3 N11 <sup>7</sup>  | 59.09(3)  | N7 C8 C7    | 118.20(14) |
| O5 <sup>8</sup> K3 N12 <sup>9</sup>  | 86.57(3)  | N8 C8 C7    | 119.50(14) |
| O12 <sup>7</sup> K3 N1 <sup>8</sup>  | 121.97(3) | O11 C10 C9  | 117.54(14) |
| O12 <sup>7</sup> K3 N11 <sup>7</sup> | 22.32(3)  | N9 C10 O11  | 113.04(13) |
| O12 <sup>7</sup> K3 N12 <sup>9</sup> | 105.32(3) | N9 C10 C9   | 129.41(15) |
| O13 K3 O1 <sup>6</sup>               | 76.93(3)  | N9 C11 C12  | 123.74(13) |
| O13 <sup>7</sup> K3 O1 <sup>6</sup>  | 75.59(4)  | N10 C11 N9  | 114.60(13) |
| O13 K3 O2 <sup>7</sup>               | 110.57(4) | N10 C11 C12 | 121.65(14) |
| O13 <sup>7</sup> K3 O2 <sup>7</sup>  | 99.55(3)  | N11 C12 C11 | 118.46(13) |
| O13 <sup>7</sup> K3 O5 <sup>8</sup>  | 67.20(3)  | N12 C12 N11 | 121.28(13) |
| O13 K3 O5 <sup>8</sup>               | 145.12(4) | N12 C12 C11 | 120.24(13) |

**Table S11.** Anisotropic displacement parameters ( $\text{\AA}^2 \times 10^3$ ) for **4**. The anisotropic displacement factor exponent takes the form:  $-2 \pi^2 [h^2 a^{*2} U_{11} + \dots + 2 h k a^* b^* U_{12}]$ .

|    | U11       | U22       | U33       | U23       | U13      | U12       |
|----|-----------|-----------|-----------|-----------|----------|-----------|
| K1 | 28.80(18) | 19.98(17) | 18.54(16) | -1.17(13) | 0.36(14) | -3.01(14) |
| K2 | 20.23(16) | 20.45(16) | 16.45(16) | -1.15(12) | 0.53(12) | -0.15(13) |
| K3 | 14.82(15) | 32.59(19) | 16.08(16) | 2.23(13)  | 0.06(12) | 0.65(13)  |
| O1 | 33.2(6)   | 23.1(6)   | 18.6(5)   | 0.7(4)    | -4.8(5)  | 6.9(5)    |
| O2 | 27.5(6)   | 22.0(6)   | 22.7(6)   | 0.9(4)    | 2.9(5)   | -8.4(5)   |
| O3 | 23.0(6)   | 27.7(6)   | 19.4(5)   | -0.9(5)   | -4.8(4)  | -0.8(5)   |
| O4 | 34.8(6)   | 22.1(6)   | 14.7(5)   | 1.2(4)    | -0.1(5)  | -1.0(5)   |
| O5 | 24.2(6)   | 19.3(5)   | 24.6(6)   | -3.7(4)   | -1.5(5)  | -4.7(5)   |
| O6 | 25.0(6)   | 48.2(8)   | 25.4(6)   | 7.3(6)    | 4.2(5)   | 0.9(6)    |
| O7 | 83.2(11)  | 23.9(6)   | 20.0(6)   | 3.0(5)    | 0.4(7)   | -19.9(7)  |



|     |          |          |         |         |         |         |
|-----|----------|----------|---------|---------|---------|---------|
| O8  | 44.6(7)  | 23.0(6)  | 20.2(6) | -2.9(5) | 0.3(5)  | 0.0(5)  |
| O9  | 53.4(8)  | 22.2(6)  | 15.5(6) | 0.2(4)  | 8.2(5)  | -0.3(6) |
| O10 | 36.7(7)  | 19.0(6)  | 21.7(6) | -4.0(4) | 5.1(5)  | -0.3(5) |
| O11 | 31.6(7)  | 54.3(8)  | 16.7(6) | 11.0(5) | 3.6(5)  | 18.5(6) |
| O12 | 19.4(5)  | 27.2(6)  | 22.9(6) | -3.5(5) | 6.1(4)  | -7.7(5) |
| O13 | 16.6(5)  | 41.9(7)  | 15.1(5) | 2.4(5)  | -0.9(4) | 2.7(5)  |
| O14 | 18.6(5)  | 31.3(6)  | 22.5(6) | 1.1(5)  | -6.3(4) | -6.9(5) |
| O15 | 18.0(5)  | 33.1(6)  | 14.3(5) | 2.9(4)  | 2.0(4)  | -2.2(5) |
| N1  | 23.6(7)  | 19.6(6)  | 17.0(6) | -1.0(5) | -1.2(5) | 2.0(5)  |
| N2  | 33.7(8)  | 25.3(7)  | 17.4(6) | -2.3(5) | -2.8(6) | 7.1(6)  |
| N3  | 17.3(6)  | 18.7(6)  | 17.3(6) | -2.8(5) | 1.7(5)  | 1.7(5)  |
| N4  | 18.8(6)  | 16.9(6)  | 17.6(6) | -1.5(5) | 1.1(5)  | 2.2(5)  |
| N5  | 25.7(7)  | 27.9(7)  | 16.2(6) | 1.9(5)  | -1.4(5) | -2.3(6) |
| N6  | 29.2(8)  | 48.8(10) | 22.2(7) | 8.6(7)  | -1.3(6) | -1.1(7) |
| N7  | 42.2(9)  | 21.4(7)  | 16.7(6) | 1.7(5)  | -5.3(6) | -4.1(6) |
| N8  | 25.8(7)  | 20.3(7)  | 16.4(6) | -0.6(5) | 0.1(5)  | 1.0(5)  |
| N9  | 20.7(7)  | 27.6(7)  | 14.2(6) | 0.0(5)  | 2.4(5)  | 4.4(5)  |
| N10 | 34.8(8)  | 55.1(10) | 18.0(7) | 10.1(7) | 8.4(6)  | 21.4(8) |
| N11 | 14.7(6)  | 21.8(6)  | 15.9(6) | -3.0(5) | 3.9(5)  | 1.3(5)  |
| N12 | 14.8(6)  | 19.1(6)  | 16.6(6) | 1.1(5)  | -0.8(5) | 1.5(5)  |
| C1  | 33.2(9)  | 24.6(8)  | 17.8(8) | 0.4(6)  | -2.4(7) | -0.2(7) |
| C2  | 20.6(7)  | 17.0(7)  | 20.5(8) | 0.3(6)  | -0.5(6) | -2.5(6) |
| C3  | 18.4(7)  | 16.6(7)  | 18.1(7) | -0.5(6) | 0.2(6)  | -1.7(6) |
| C4  | 21.1(7)  | 17.6(7)  | 16.2(7) | -0.6(6) | -0.4(6) | -1.1(6) |
| C5  | 33.0(10) | 49.1(11) | 17.4(8) | 1.7(8)  | 2.2(7)  | -7.8(8) |
| C6  | 24.0(8)  | 25.3(8)  | 21.0(8) | 2.0(6)  | -0.9(6) | -6.3(7) |
| C7  | 26.4(8)  | 20.9(8)  | 17.9(7) | 1.2(6)  | -2.0(6) | -5.3(6) |
| C8  | 32.9(9)  | 19.8(8)  | 15.7(7) | 0.3(6)  | -1.3(6) | -3.7(7) |
| C9  | 37.2(10) | 45.0(11) | 15.3(8) | -0.5(7) | 3.5(7)  | 2.9(8)  |
| C10 | 21.2(8)  | 23.0(8)  | 16.7(7) | -0.8(6) | 1.4(6)  | 1.5(6)  |
| C11 | 17.1(7)  | 19.3(7)  | 16.4(7) | 0.0(6)  | 1.4(6)  | 0.4(6)  |
| C12 | 14.3(7)  | 22.4(8)  | 14.6(7) | 0.0(6)  | 0.9(5)  | 0.0(6)  |

**Table S12.** Hydrogen coordinates ( $\times 10^4$ ) and isotropic displacement parameters ( $\text{\AA}^2 \times 10^3$ ) for **4**.

|     | x       | y       | z       | U(eq) |
|-----|---------|---------|---------|-------|
| H1A | -191.91 | 935.92  | 1937.43 | 38    |
| H1B | 1782.61 | 768.1   | 1989.26 | 38    |
| H1C | 1122.1  | 1711.68 | 1887.22 | 38    |

|     |         |         |         |    |
|-----|---------|---------|---------|----|
| H5A | 2325.4  | 4298.11 | 6197.36 | 50 |
| H5B | 2842.5  | 3302.67 | 6154.46 | 50 |
| H5C | 898.92  | 3565.48 | 6190.77 | 50 |
| H9A | 7276.3  | 3193.56 | 4609.83 | 49 |
| H9B | 6844.46 | 4184.32 | 4529.07 | 49 |
| H9C | 8630.62 | 3933.67 | 4690.16 | 49 |

**Table S13.** Atomic coordinates ( $\times 10^4$ ) and equivalent isotropic displacement parameters ( $\text{\AA}^2 \times 10^3$ ) for **7**.  $U(\text{eq})$  is defined as one third of the trace of the orthogonalized  $U_{ij}$  tensor.

|      | x       | y        | z        | $U(\text{eq})$ |
|------|---------|----------|----------|----------------|
| O(1) | 5467(4) | 6588(4)  | 1019(3)  | 44(1)          |
| O(2) | 1300(4) | 11760(4) | 381(3)   | 43(1)          |
| O(3) | 2560(5) | 10445(5) | 1696(3)  | 46(1)          |
| O(4) | 1174(5) | 10363(5) | -1499(3) | 49(1)          |
| O(5) | 2362(6) | 8097(5)  | -1507(3) | 54(1)          |
| N(1) | 5038(5) | 8058(5)  | 535(4)   | 43(1)          |
| N(2) | 2823(4) | 6746(5)  | 972(3)   | 34(1)          |
| N(4) | 2089(4) | 10590(5) | 716(3)   | 30(1)          |
| N(5) | 1991(5) | 9310(5)  | -1016(3) | 36(1)          |
| C(4) | 2508(5) | 9373(5)  | 65(3)    | 29(1)          |
| C(3) | 3468(5) | 8075(5)  | 532(3)   | 28(1)          |
| C(2) | 4085(5) | 5908(6)  | 1247(3)  | 30(1)          |
| C(1) | 4200(7) | 4349(6)  | 1756(4)  | 45(1)          |
| N(6) | 774(8)  | 15(9)    | 3907(5)  | 79(2)          |
| N(7) | 513(5)  | 1427(6)  | 3358(4)  | 50(1)          |

**Table S14.** Bond lengths [ $\text{\AA}$ ] and angles [deg] for **7**.

|           |          |
|-----------|----------|
| O(1)-C(2) | 1.336(5) |
| O(1)-N(1) | 1.419(6) |
| O(2)-N(4) | 1.242(5) |
| O(3)-N(4) | 1.256(5) |
| O(4)-N(5) | 1.245(6) |
| O(5)-N(5) | 1.252(6) |
| N(1)-C(3) | 1.303(6) |
| N(2)-C(2) | 1.288(6) |
| N(2)-C(3) | 1.384(6) |
| N(4)-C(4) | 1.378(6) |

|            |          |
|------------|----------|
| N(5)-C(4)  | 1.378(5) |
| C(4)-C(3)  | 1.452(6) |
| C(2)-C(1)  | 1.468(7) |
| C(1)-H(1A) | 0.9600   |
| C(1)-H(1B) | 0.9600   |
| C(1)-H(1C) | 0.9600   |
| N(6)-N(7)  | 1.389(8) |
| N(6)-H(6B) | 0.8900   |
| N(6)-H(6A) | 0.8898   |
| N(7)-H(7A) | 0.8900   |
| N(7)-H(7B) | 0.8898   |
| N(7)-H(7C) | 0.8900   |

|                  |          |
|------------------|----------|
| C(2)-O(1)-N(1)   | 106.5(3) |
| C(3)-N(1)-O(1)   | 103.0(4) |
| C(2)-N(2)-C(3)   | 102.9(4) |
| O(2)-N(4)-O(3)   | 121.0(4) |
| O(2)-N(4)-C(4)   | 123.7(4) |
| O(3)-N(4)-C(4)   | 115.3(4) |
| O(4)-N(5)-O(5)   | 120.1(4) |
| O(4)-N(5)-C(4)   | 123.7(4) |
| O(5)-N(5)-C(4)   | 116.2(4) |
| N(4)-C(4)-N(5)   | 122.1(4) |
| N(4)-C(4)-C(3)   | 119.4(4) |
| N(5)-C(4)-C(3)   | 118.4(4) |
| N(1)-C(3)-N(2)   | 114.3(4) |
| N(1)-C(3)-C(4)   | 121.5(4) |
| N(2)-C(3)-C(4)   | 124.2(4) |
| N(2)-C(2)-O(1)   | 113.4(4) |
| N(2)-C(2)-C(1)   | 129.4(4) |
| O(1)-C(2)-C(1)   | 117.2(4) |
| C(2)-C(1)-H(1A)  | 109.5    |
| C(2)-C(1)-H(1B)  | 109.5    |
| H(1A)-C(1)-H(1B) | 109.5    |
| C(2)-C(1)-H(1C)  | 109.5    |
| H(1A)-C(1)-H(1C) | 109.5    |
| H(1B)-C(1)-H(1C) | 109.5    |
| N(7)-N(6)-H(6B)  | 109.1    |
| N(7)-N(6)-H(6A)  | 109.1    |
| H(6B)-N(6)-H(6A) | 109.7    |
| N(6)-N(7)-H(7A)  | 109.1    |
| N(6)-N(7)-H(7B)  | 110.3    |
| H(7A)-N(7)-H(7B) | 109.4    |
| N(6)-N(7)-H(7C)  | 109.0    |
| H(7A)-N(7)-H(7C) | 109.5    |

Symmetry transformations used to generate equivalent atoms:

#1 -x+1,y,-z+3/2

**Table S15.** Anisotropic displacement parameters ( $\text{\AA}^2 \times 10^3$ ) for **7**. The anisotropic displacement factor exponent takes the form:  $-2 \pi^2 [ h^2 a^{*2} U_{11} + \dots + 2 h k a^* b^* U_{12} ]$

|      | U11   | U22   | U33   | U23    | U13    | U12    |
|------|-------|-------|-------|--------|--------|--------|
| O(1) | 30(2) | 40(2) | 65(2) | 7(2)   | 10(2)  | 2(2)   |
| O(2) | 45(2) | 39(2) | 45(2) | 5(2)   | 5(2)   | 11(2)  |
| O(3) | 53(2) | 57(2) | 26(2) | -6(2)  | 1(1)   | 12(2)  |
| O(4) | 57(2) | 52(2) | 35(2) | 8(2)   | -11(2) | -6(2)  |
| O(5) | 80(3) | 53(2) | 31(2) | -9(2)  | 4(2)   | -1(2)  |
| N(1) | 30(2) | 38(2) | 63(3) | 8(2)   | 12(2)  | -3(2)  |
| N(2) | 28(2) | 42(2) | 33(2) | 5(2)   | 3(1)   | -6(2)  |
| N(4) | 26(2) | 37(2) | 28(2) | 2(2)   | 4(1)   | -2(2)  |
| N(5) | 39(2) | 43(2) | 27(2) | -1(2)  | 4(2)   | -10(2) |
| C(4) | 29(2) | 32(2) | 25(2) | 2(2)   | 5(2)   | -4(2)  |
| C(3) | 26(2) | 34(2) | 23(2) | -1(2)  | 4(1)   | -2(2)  |
| C(2) | 32(2) | 33(2) | 25(2) | -5(2)  | 4(2)   | -2(2)  |
| C(1) | 51(3) | 38(3) | 45(3) | 7(2)   | 1(2)   | 3(2)   |
| N(6) | 78(4) | 84(5) | 77(4) | 19(4)  | 19(3)  | 22(4)  |
| N(7) | 38(2) | 65(3) | 46(2) | -24(2) | 7(2)   | 0(2)   |

**Table S16.** Displacement parameters ( $\text{\AA}^2 \times 10^3$ ) for **7**.

|       | x    | y    | z    | U(eq) |
|-------|------|------|------|-------|
| H(1A) | 3318 | 3704 | 1464 | 67    |
| H(1B) | 4151 | 4460 | 2519 | 67    |
| H(1C) | 5207 | 3865 | 1618 | 67    |
| H(6B) | 334  | -765 | 3505 | 95    |
| H(6A) | 1834 | -143 | 4034 | 95    |
| H(7A) | 986  | 2203 | 3749 | 59    |
| H(7B) | 926  | 1385 | 2724 | 59    |
| H(7C) | -547 | 1605 | 3257 | 59    |

**Table S17.** Selected torsion angles [deg] for **7**.

---

|                     |           |
|---------------------|-----------|
| C(2)-O(1)-N(1)-C(3) | -0.1(5)   |
| O(2)-N(4)-C(4)-N(5) | -4.1(6)   |
| O(3)-N(4)-C(4)-N(5) | 175.7(4)  |
| O(2)-N(4)-C(4)-C(3) | 178.5(4)  |
| O(3)-N(4)-C(4)-C(3) | -1.7(6)   |
| O(4)-N(5)-C(4)-N(4) | 3.2(7)    |
| O(5)-N(5)-C(4)-N(4) | -175.5(4) |
| O(4)-N(5)-C(4)-C(3) | -179.4(4) |
| O(5)-N(5)-C(4)-C(3) | 1.9(6)    |
| O(1)-N(1)-C(3)-N(2) | 0.1(5)    |
| O(1)-N(1)-C(3)-C(4) | -177.9(4) |
| C(2)-N(2)-C(3)-N(1) | 0.0(5)    |
| C(2)-N(2)-C(3)-C(4) | 177.8(4)  |
| N(4)-C(4)-C(3)-N(1) | -94.2(5)  |
| N(5)-C(4)-C(3)-N(1) | 88.4(5)   |
| N(4)-C(4)-C(3)-N(2) | 88.1(5)   |
| N(5)-C(4)-C(3)-N(2) | -89.3(5)  |
| C(3)-N(2)-C(2)-O(1) | 0.0(5)    |
| C(3)-N(2)-C(2)-C(1) | -179.7(5) |
| N(1)-O(1)-C(2)-N(2) | 0.1(5)    |
| N(1)-O(1)-C(2)-C(1) | 179.8(4)  |

---

## 6. Copies of Spectrum

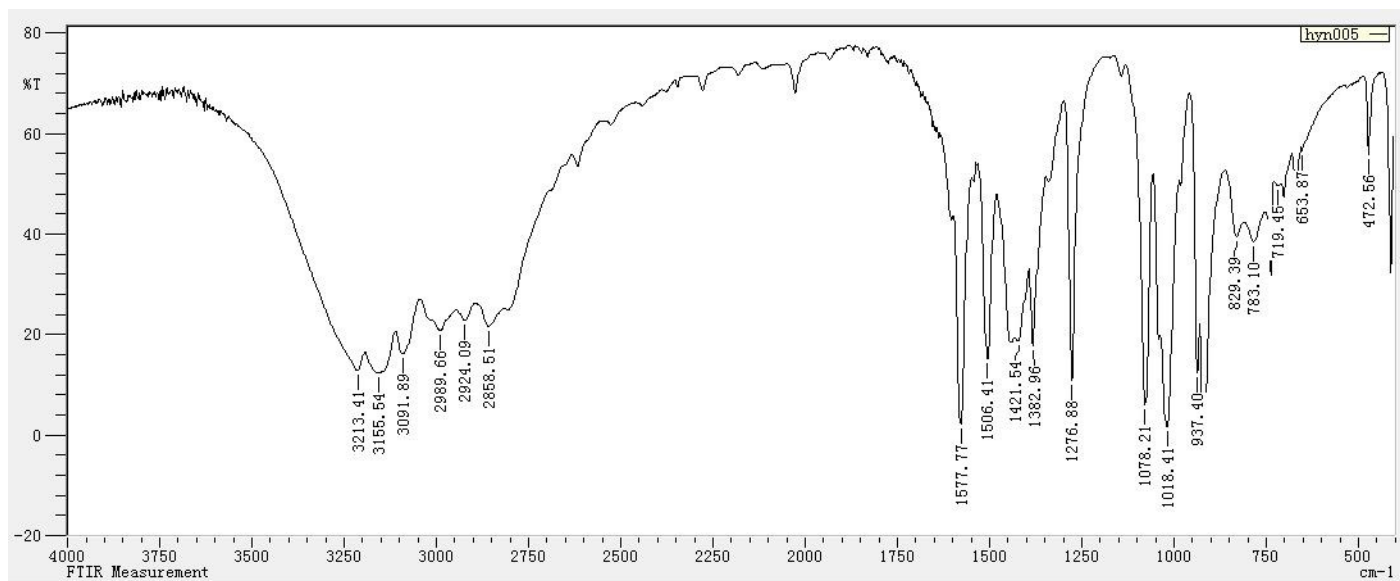

**Figure S1** IR spectrum of **2**.

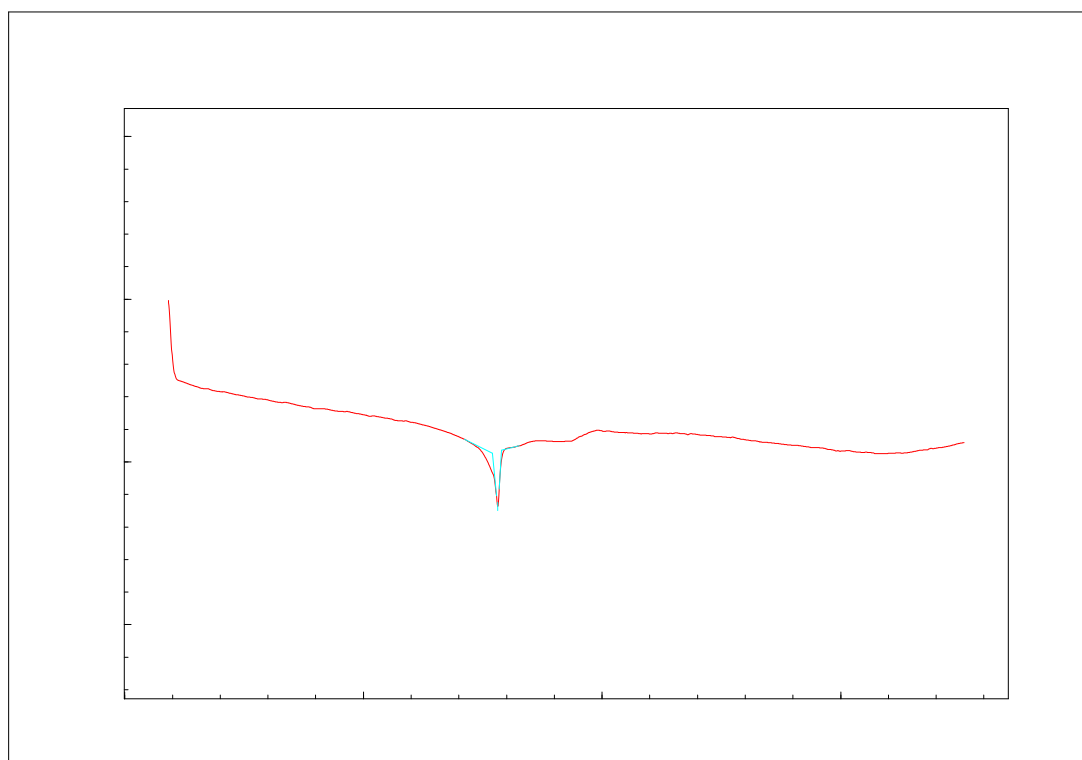

**Figure S2** DSC curve of **2** (10 °C min<sup>-1</sup>).

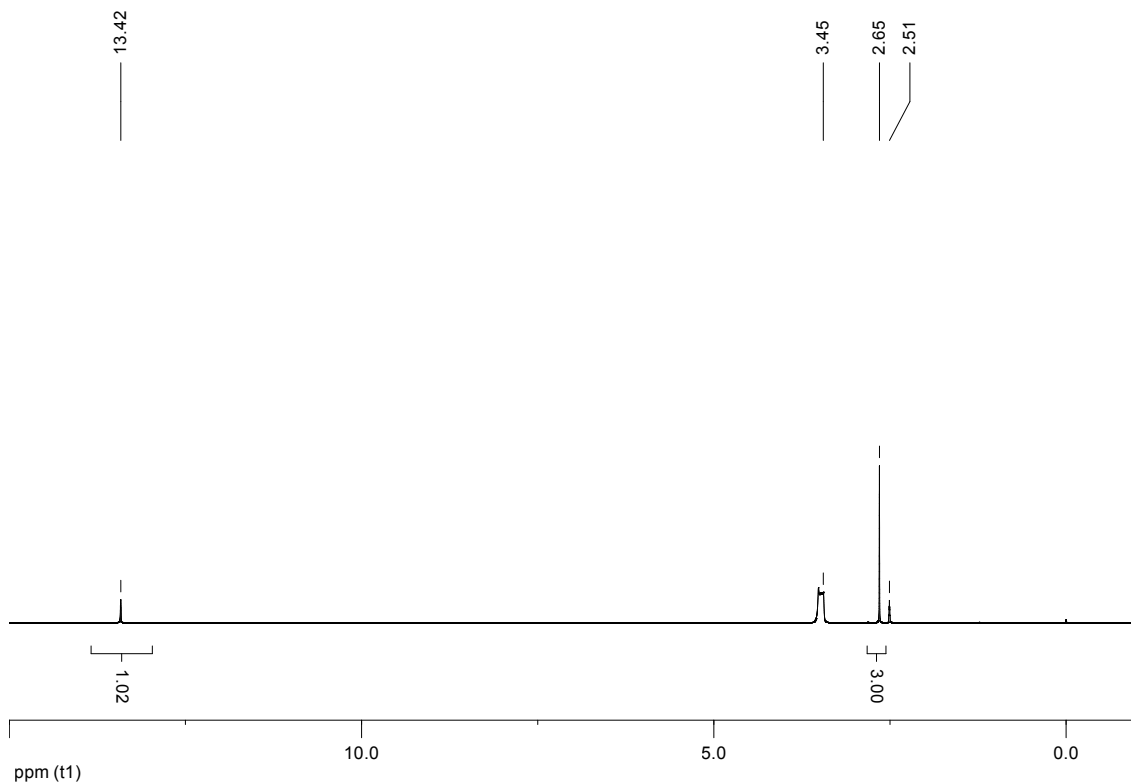

**Figure S3**  $^1\text{H}$  NMR spectrum of **2**.

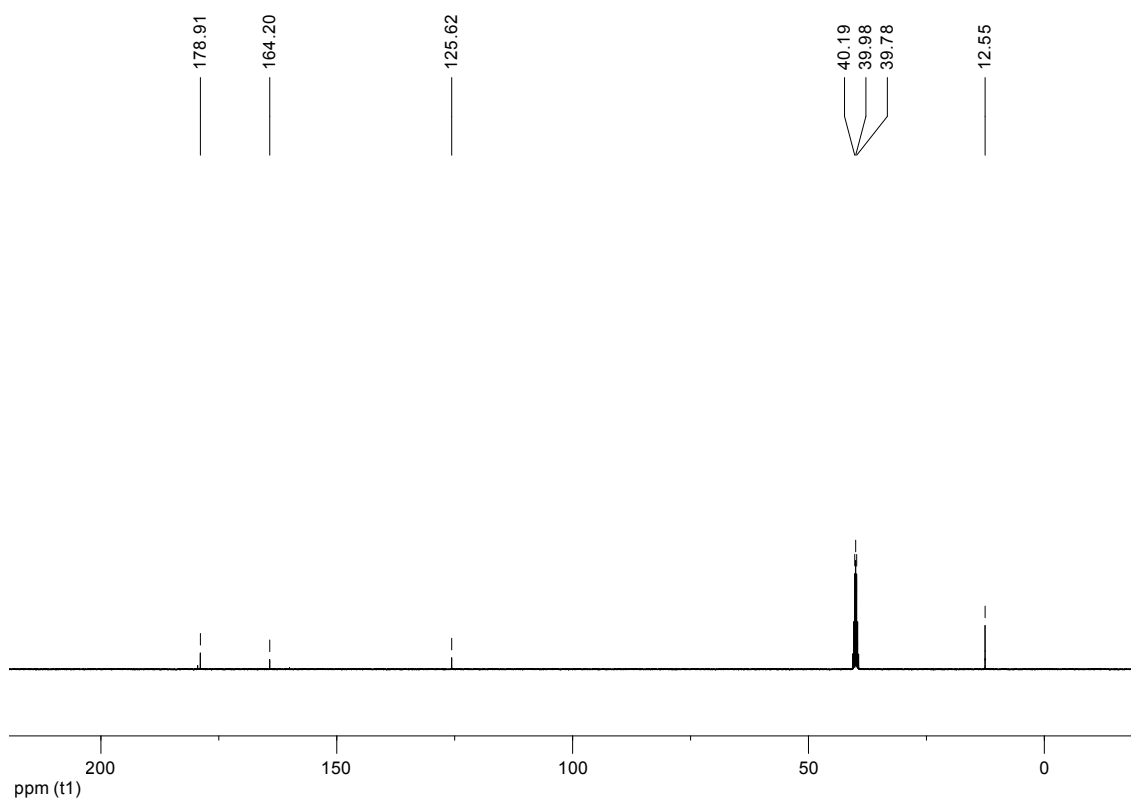

**Figure S4**  $^{13}\text{C}$  NMR spectrum of **2**.

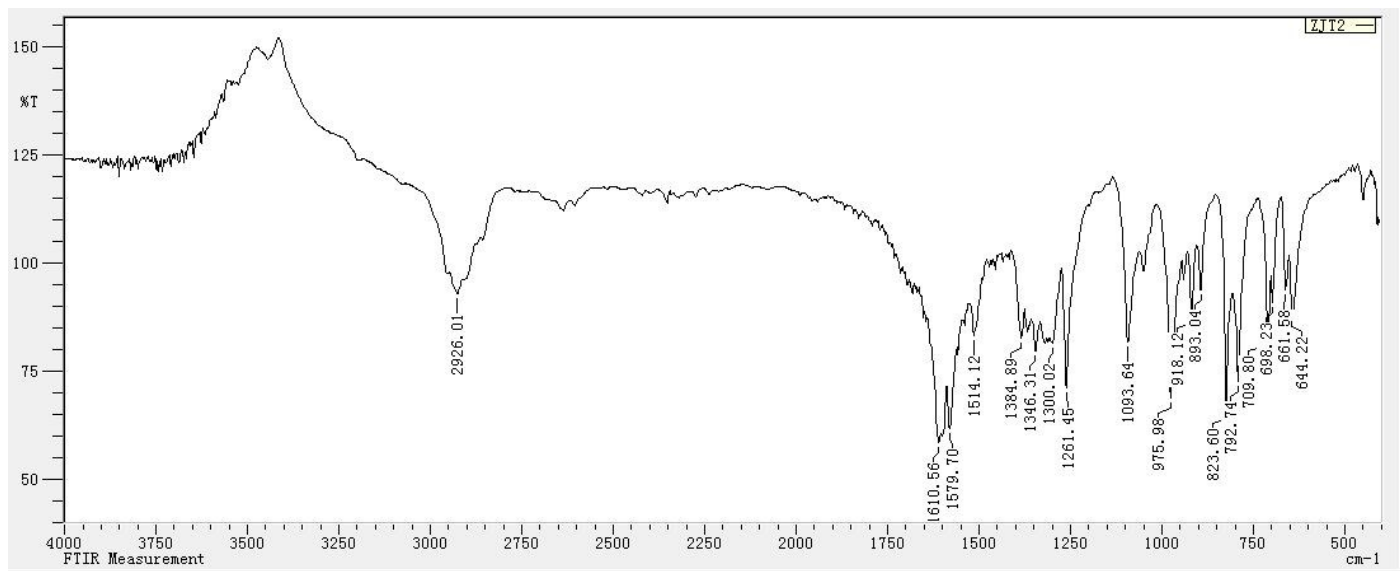

**Figure S5** IR spectrum of **3**.

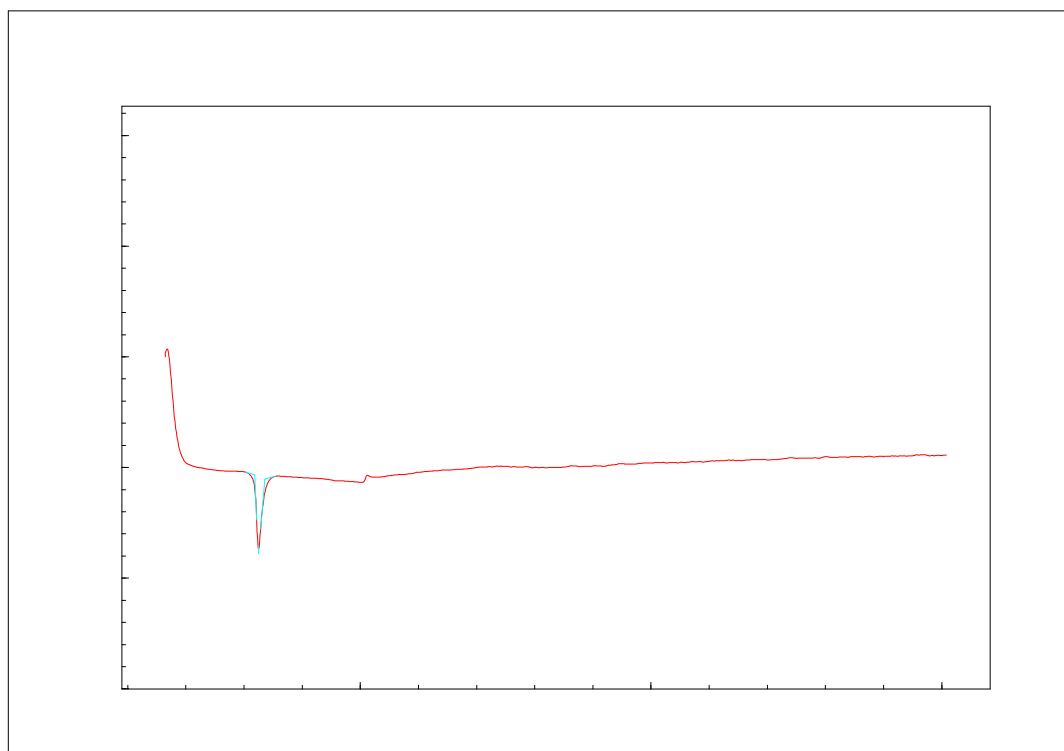

**Figure S6** DSC curve of **3** ( $10\text{ }^{\circ}\text{C min}^{-1}$ )



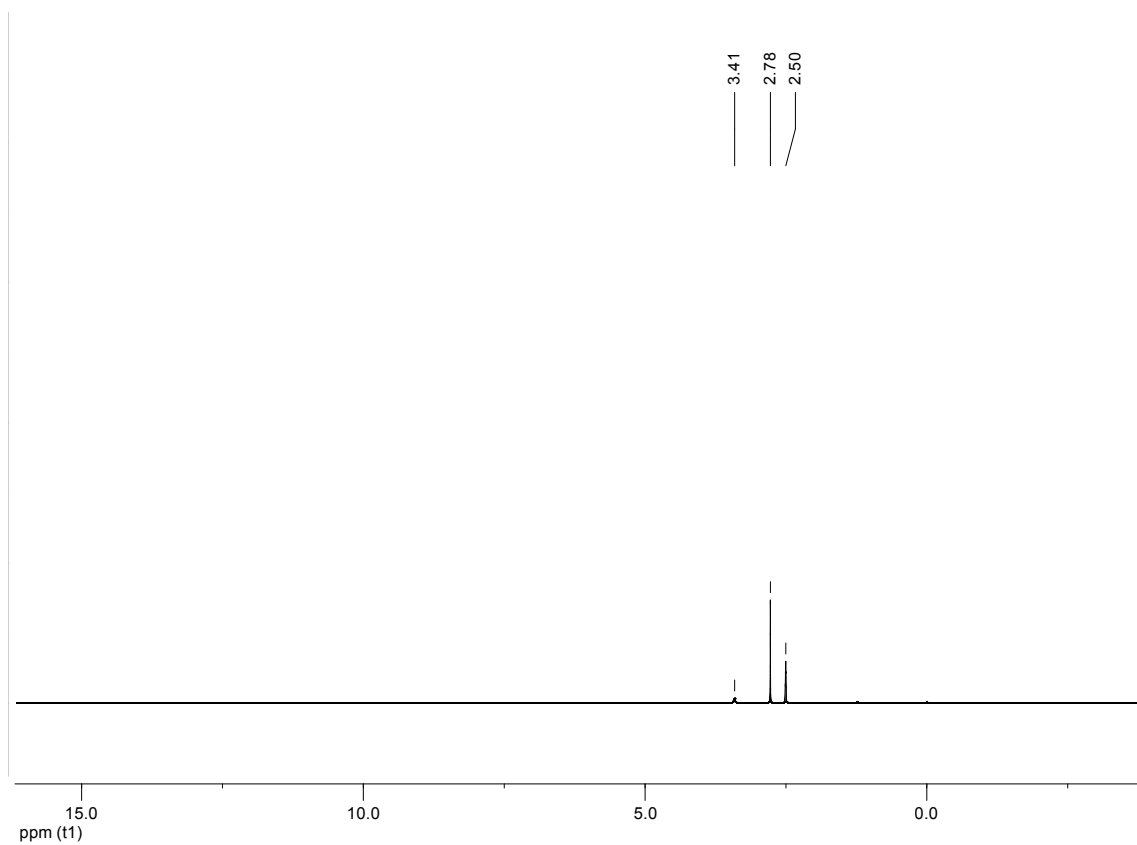

**Figure S7**  $^1\text{H}$  NMR spectrum of **3**.

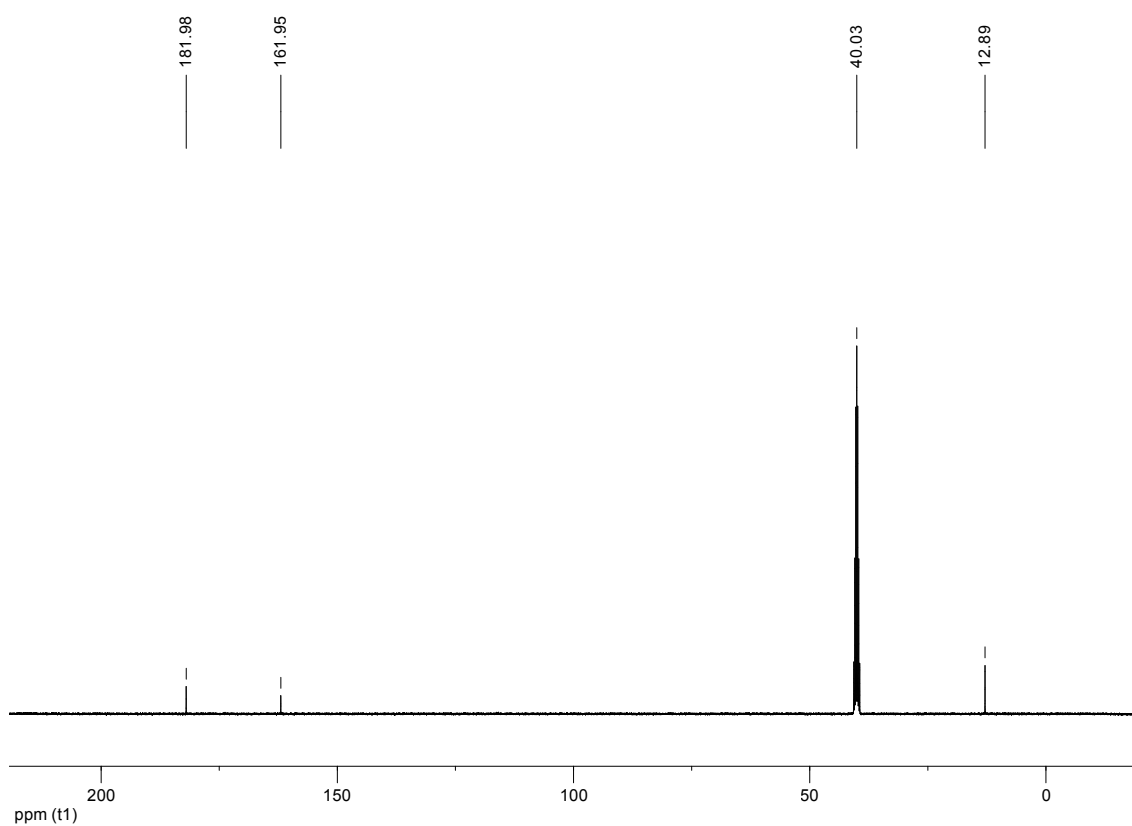

**Figure S8**  $^{13}\text{C}$  NMR spectrum of **3**.

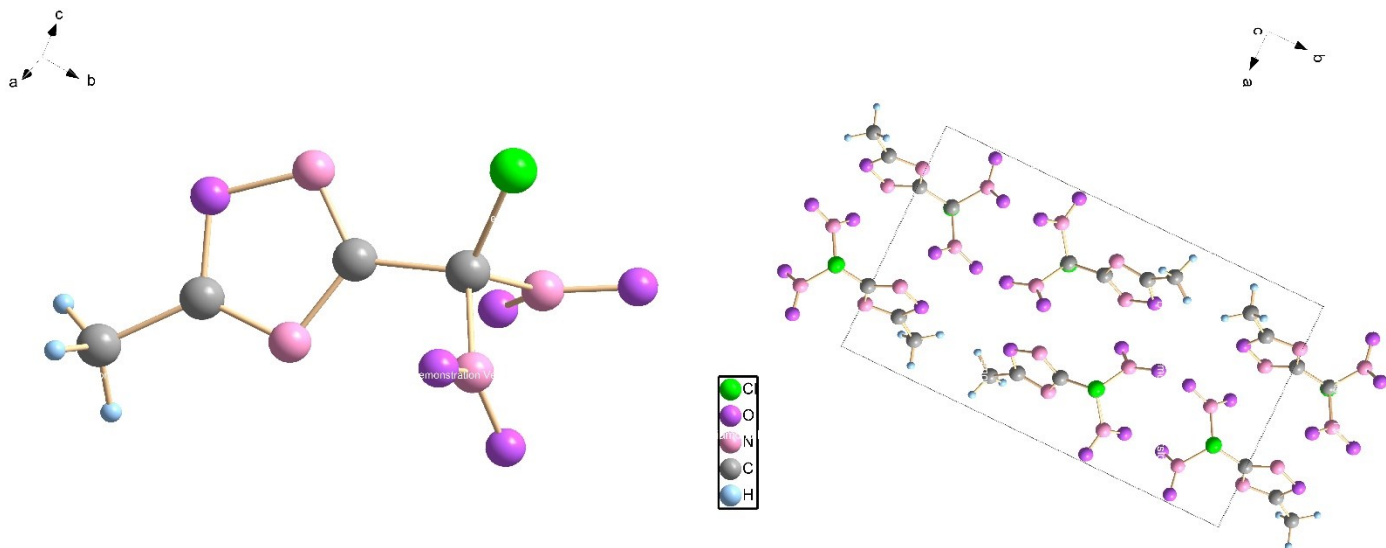

**Figure S9** X-ray crystal structure of **3**

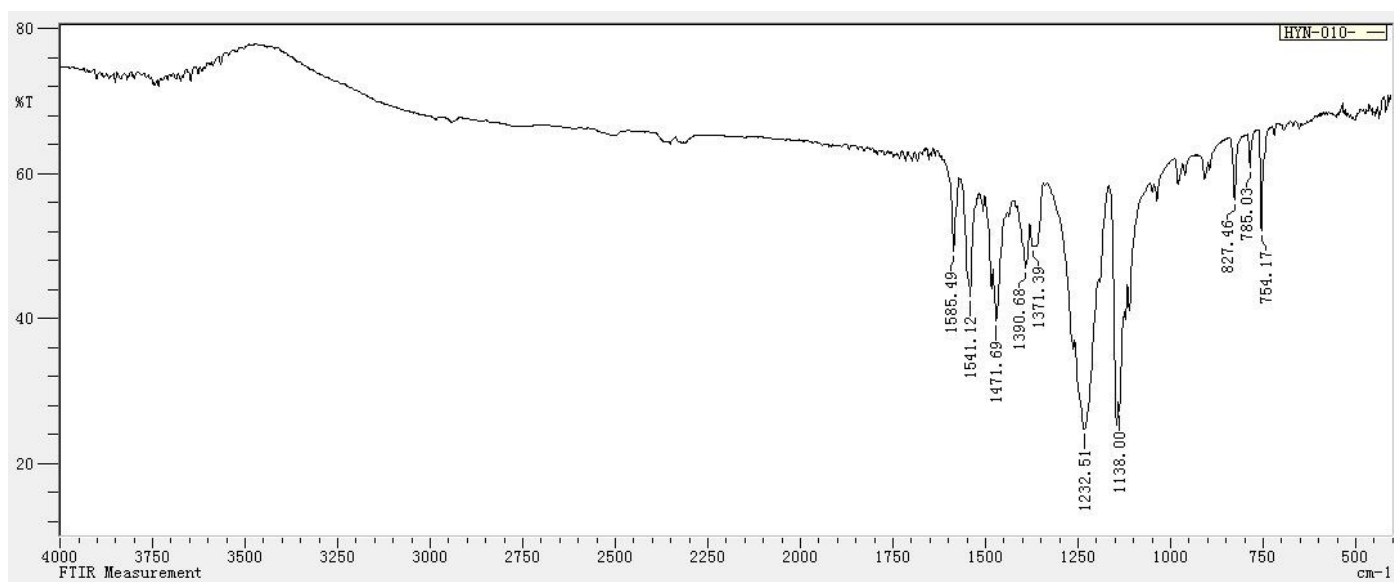

**Figure S10** IR spectrum of **4**.

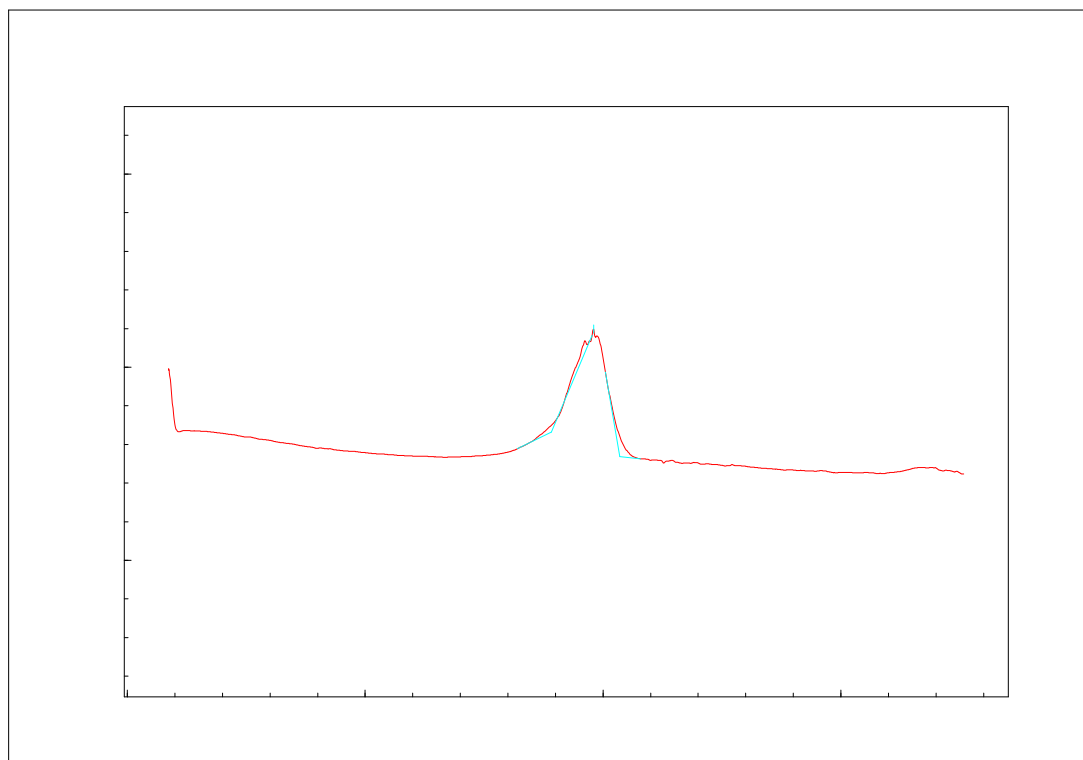

**Figure S11** DSC curve of **4** ( $10\text{ °C min}^{-1}$ )

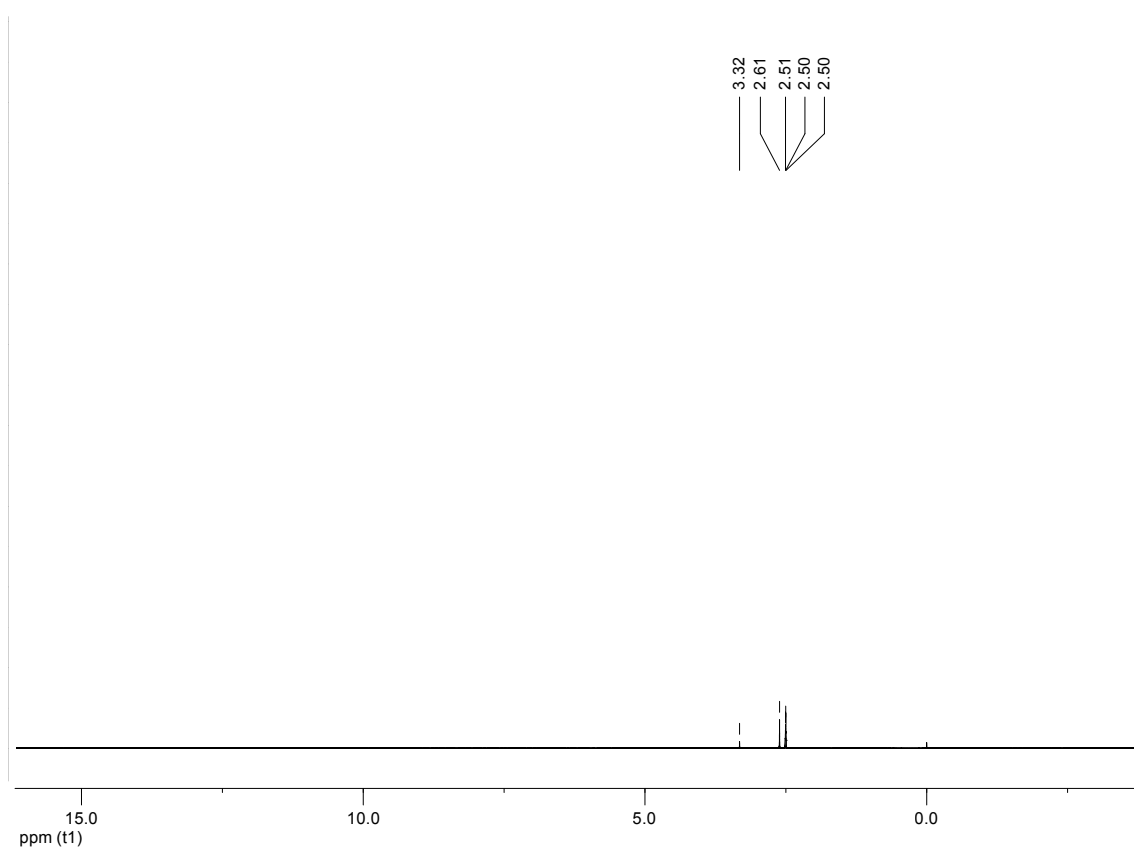

**Figure S12**  $^1\text{H}$  NMR spectrum of **4**.

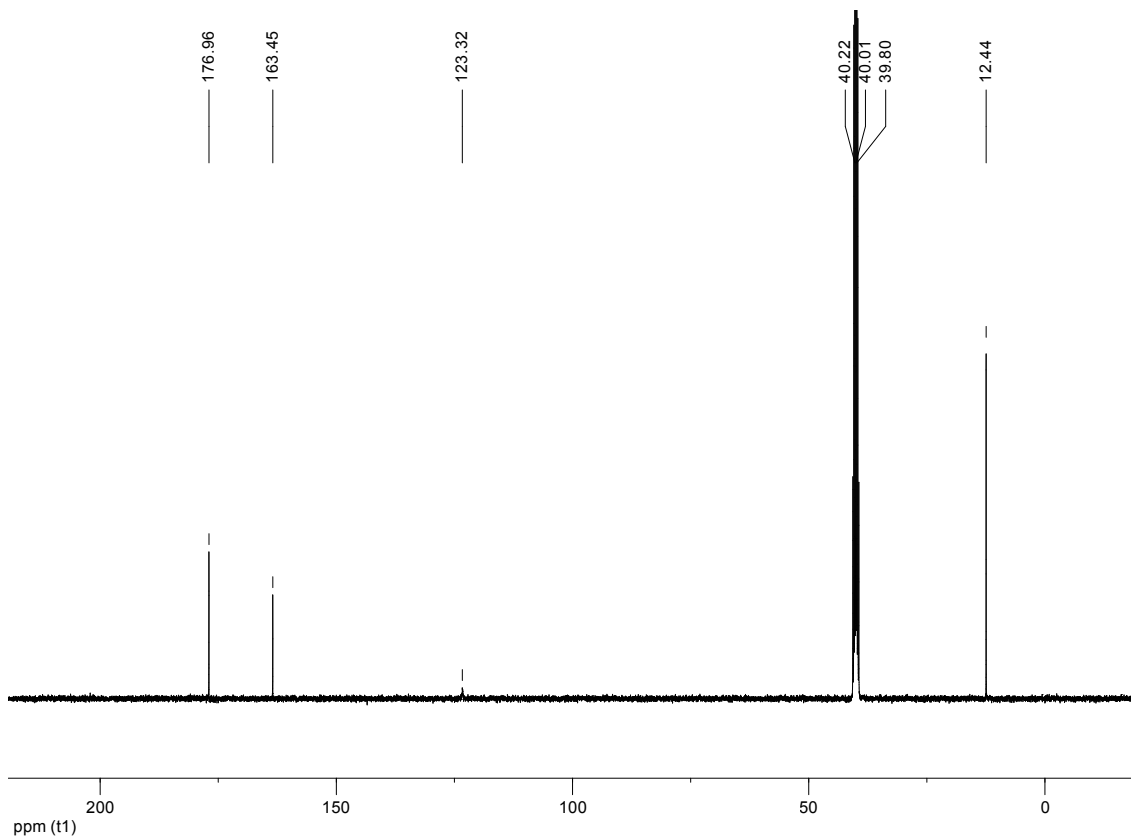

**Figure S13**  $^{13}\text{C}$  NMR spectrum of **4**.

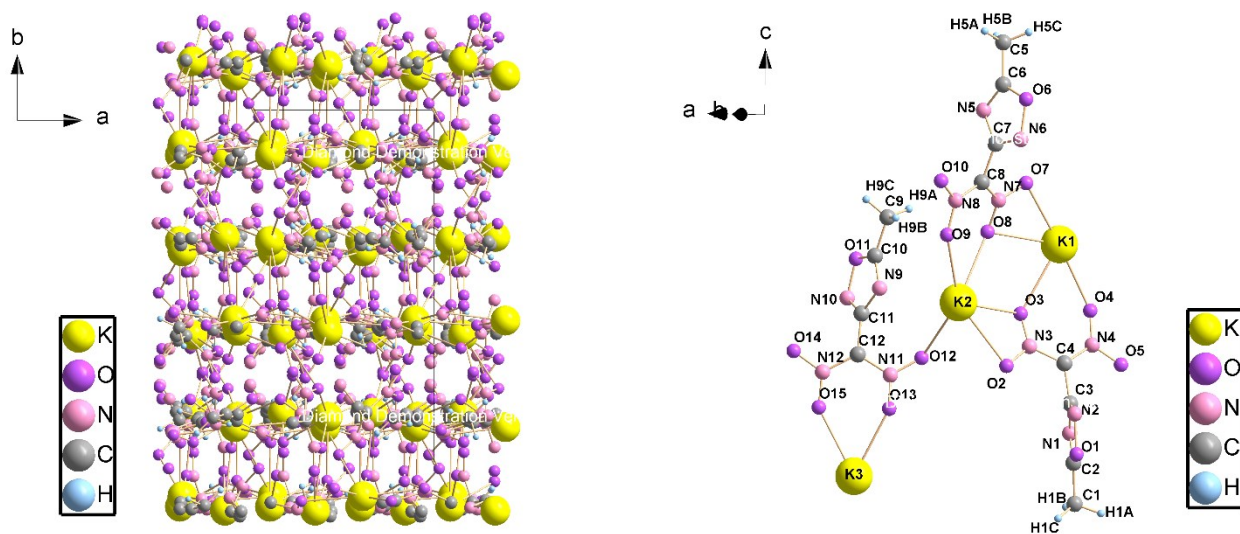

**Figure S14** X-ray crystal structure of **4**

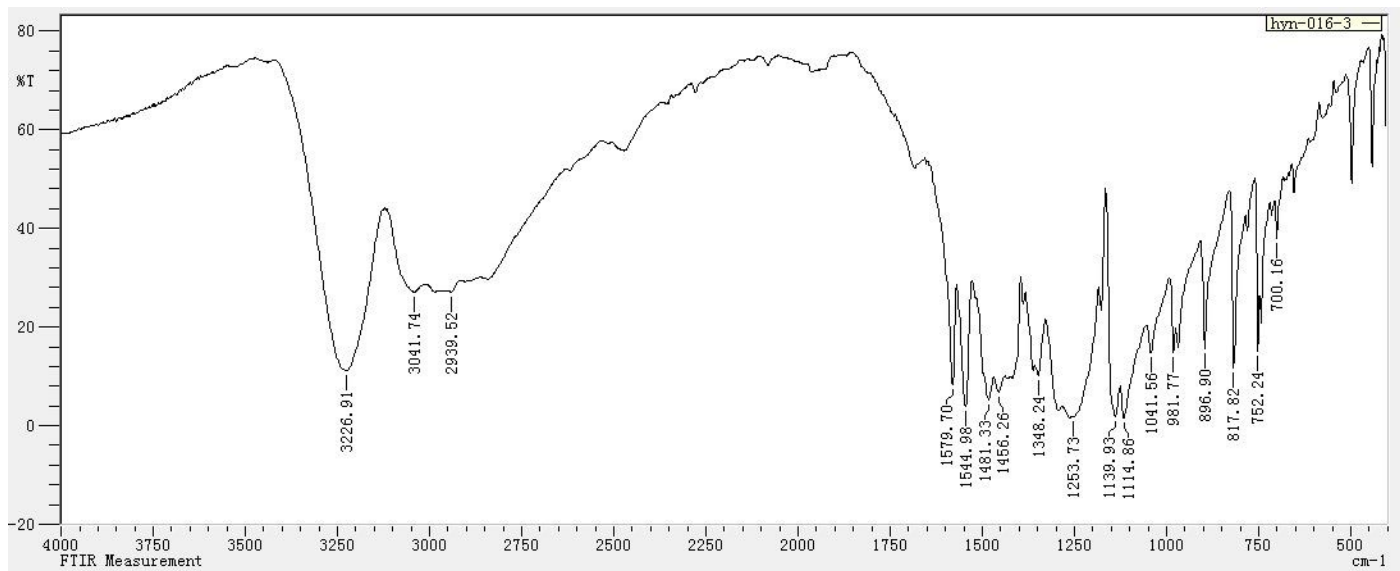

**Figure S15** IR spectrum of **5**

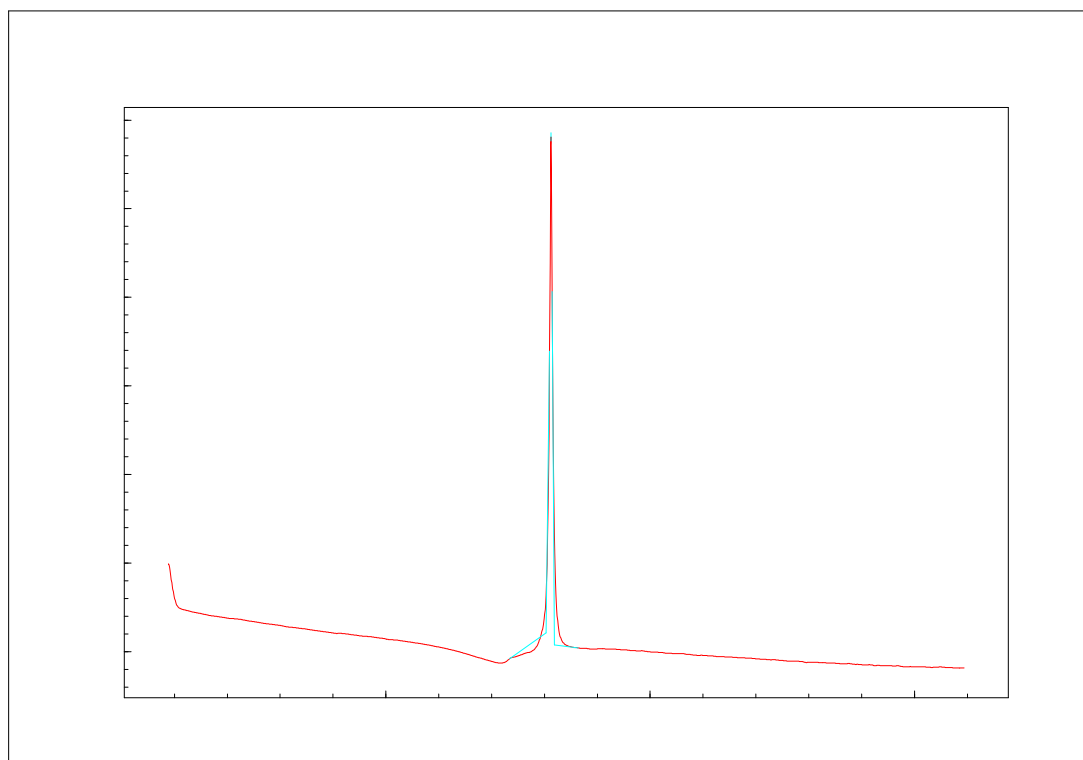

**Figure S16** DSC curve of **5** (10 °C min<sup>-1</sup>)

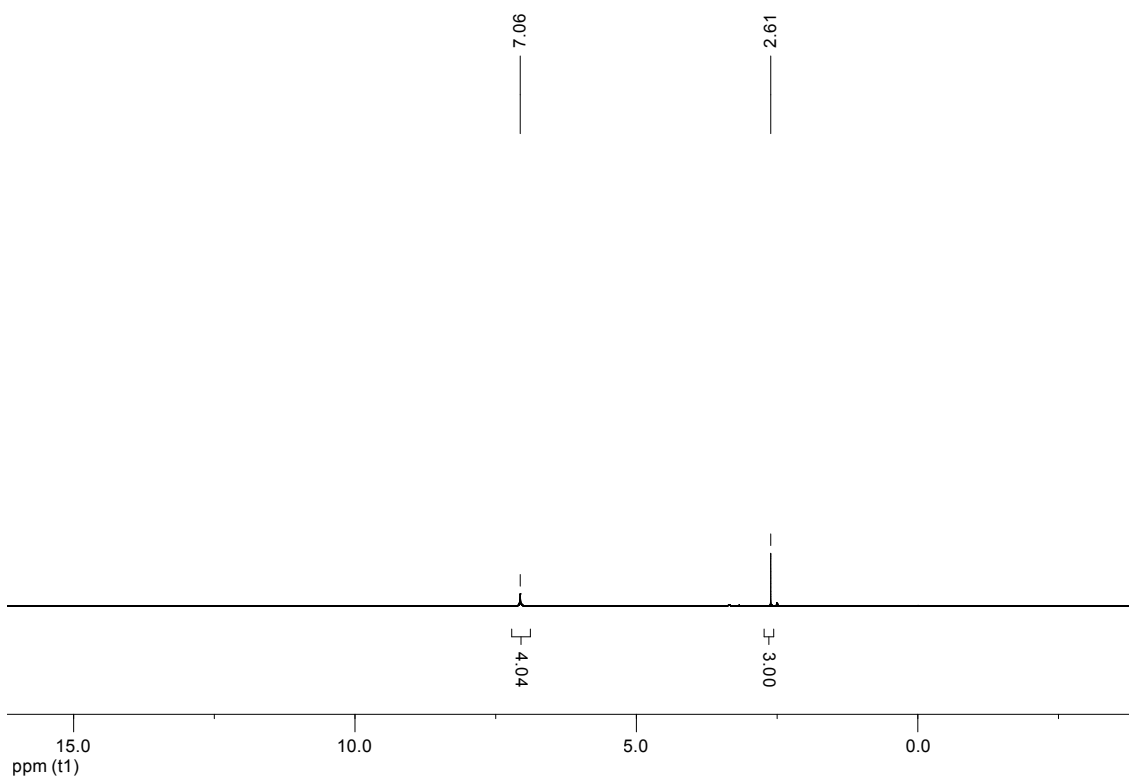

**Figure S17**  $^1\text{H}$  NMR spectrum of **5**

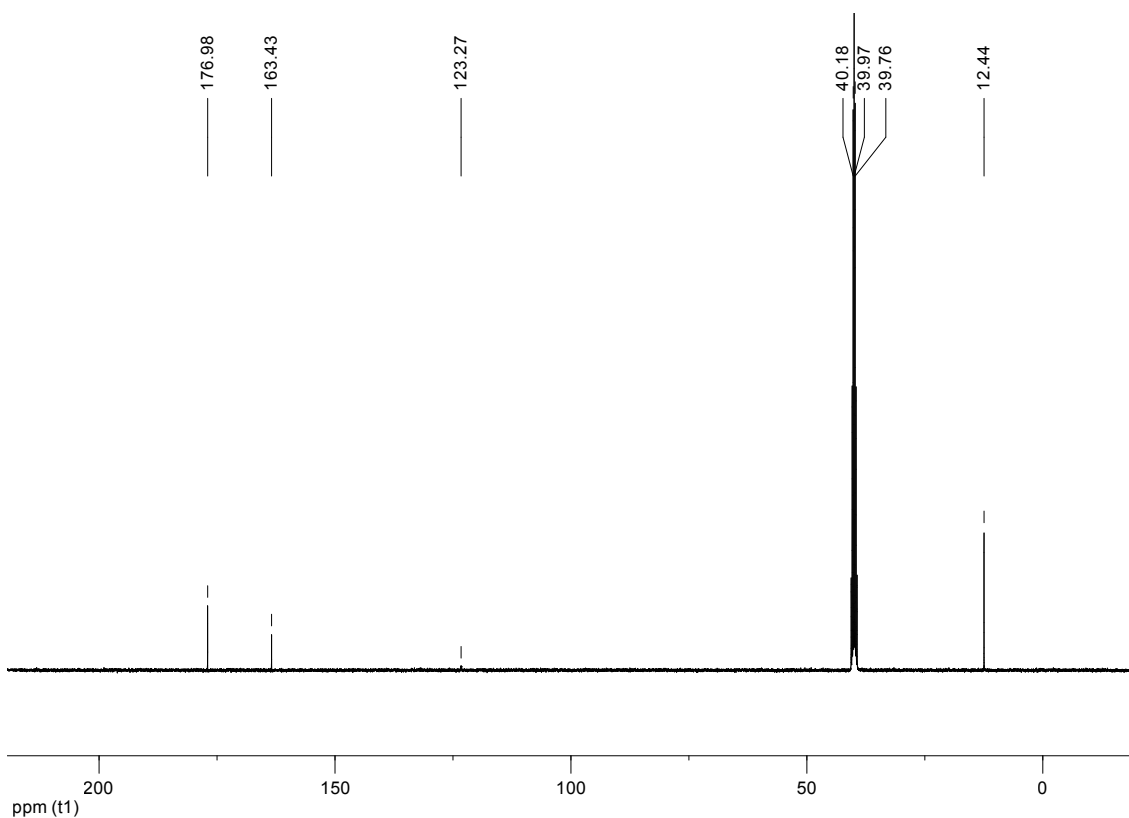

**Figure S18**  $^{13}\text{C}$  NMR spectrum of **5**.

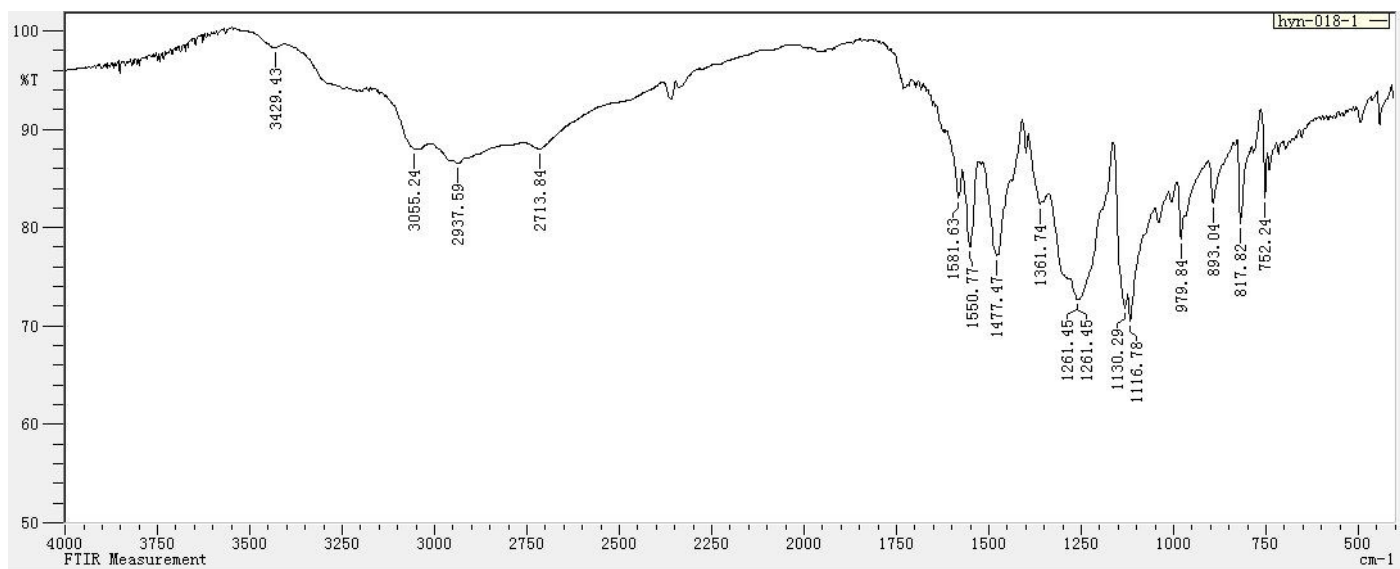

**Figure S19** IR spectrum of **6**.

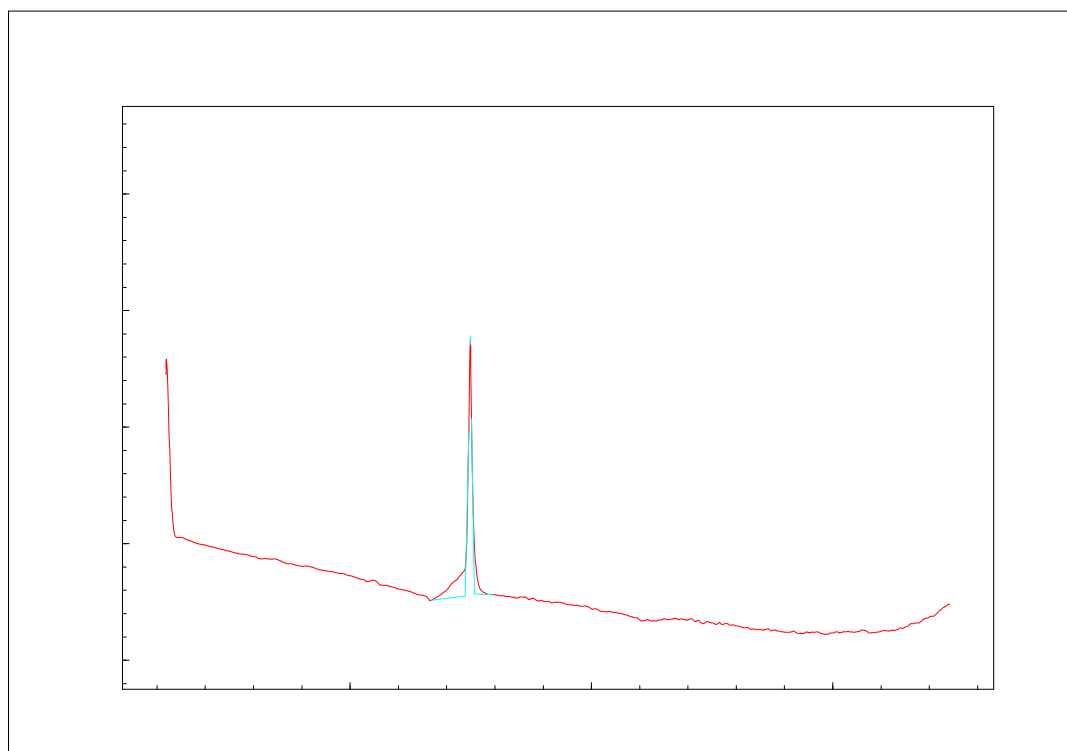

**Figure S20** DSC curve of **6** ( $10\text{ }^{\circ}\text{C min}^{-1}$ )

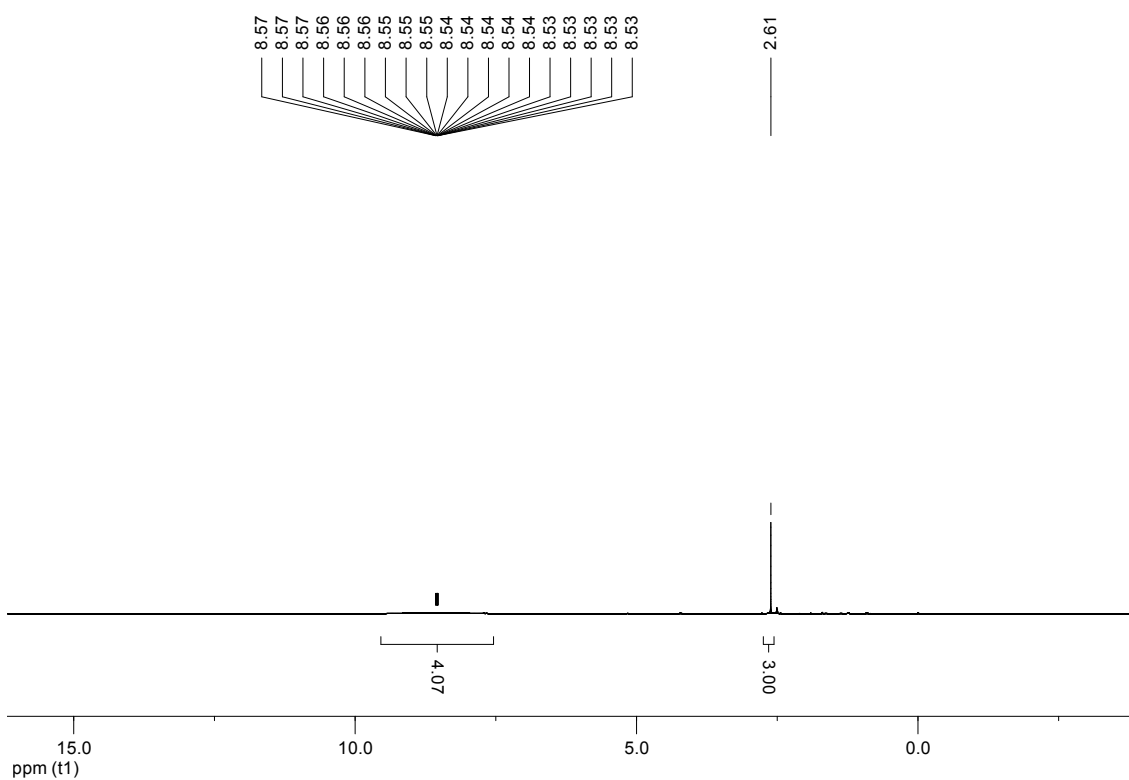

**Figure S21**  $^1\text{H}$  NMR spectrum of **6**

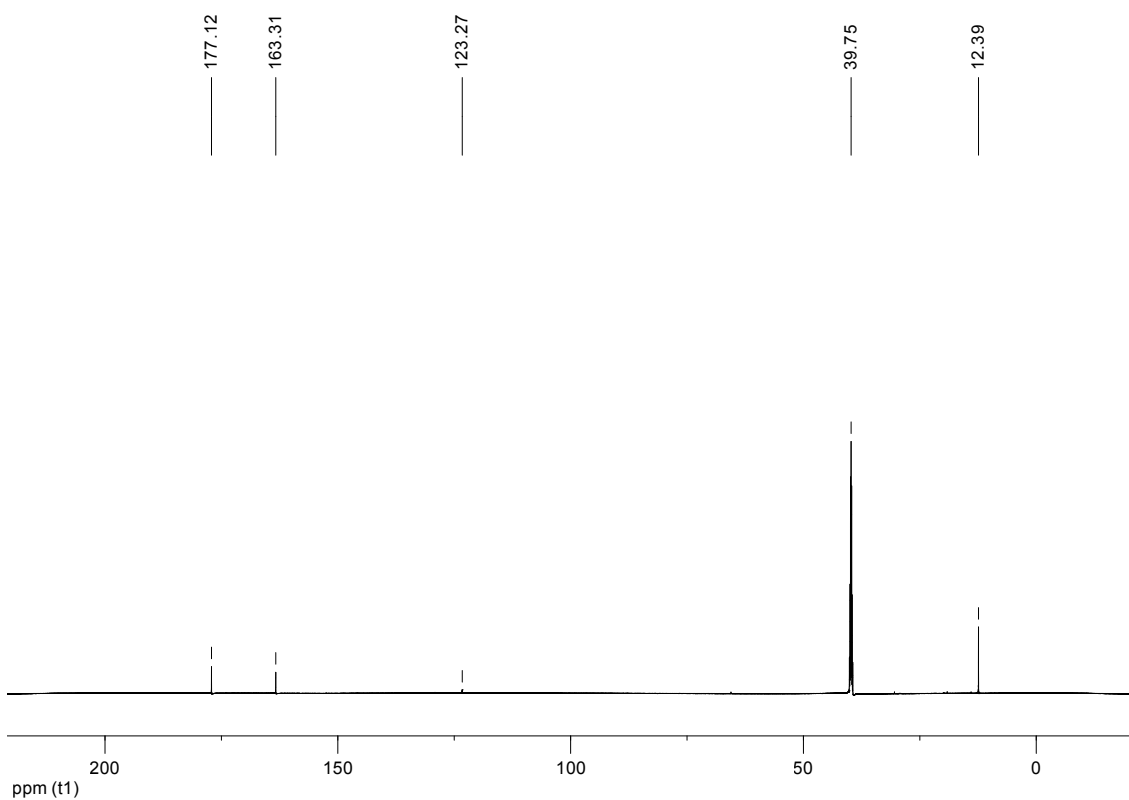

**Figure S22**  $^{13}\text{C}$  NMR spectrum of **6**.



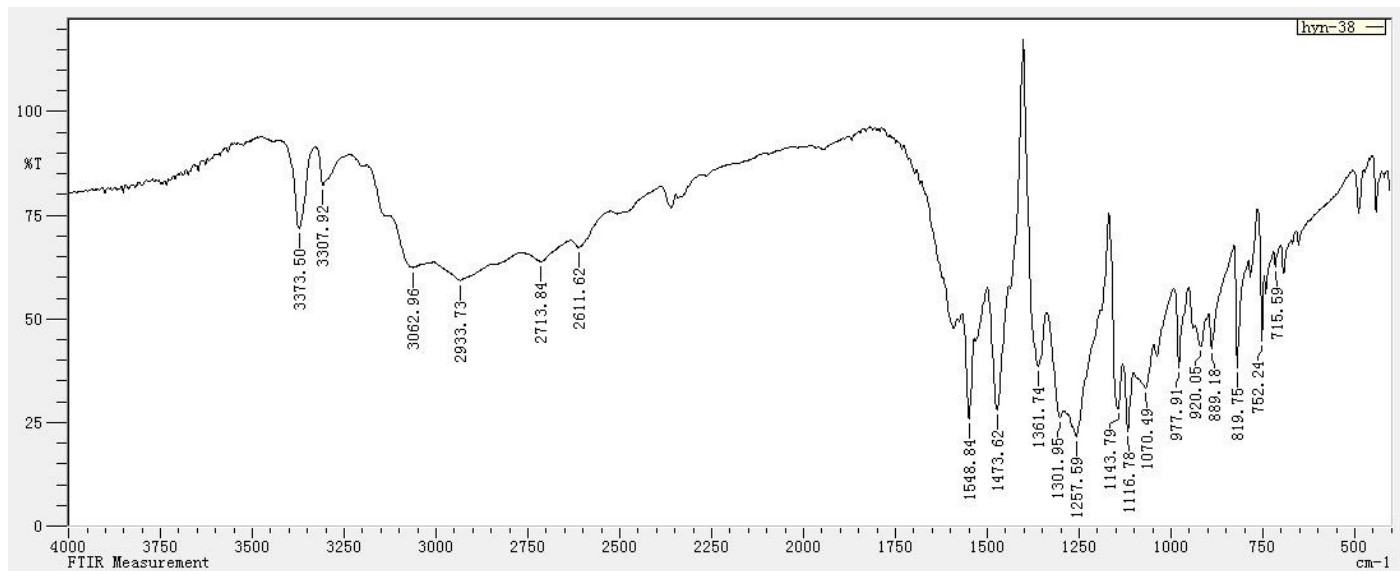

**Figure S23** IR spectrum of 7.

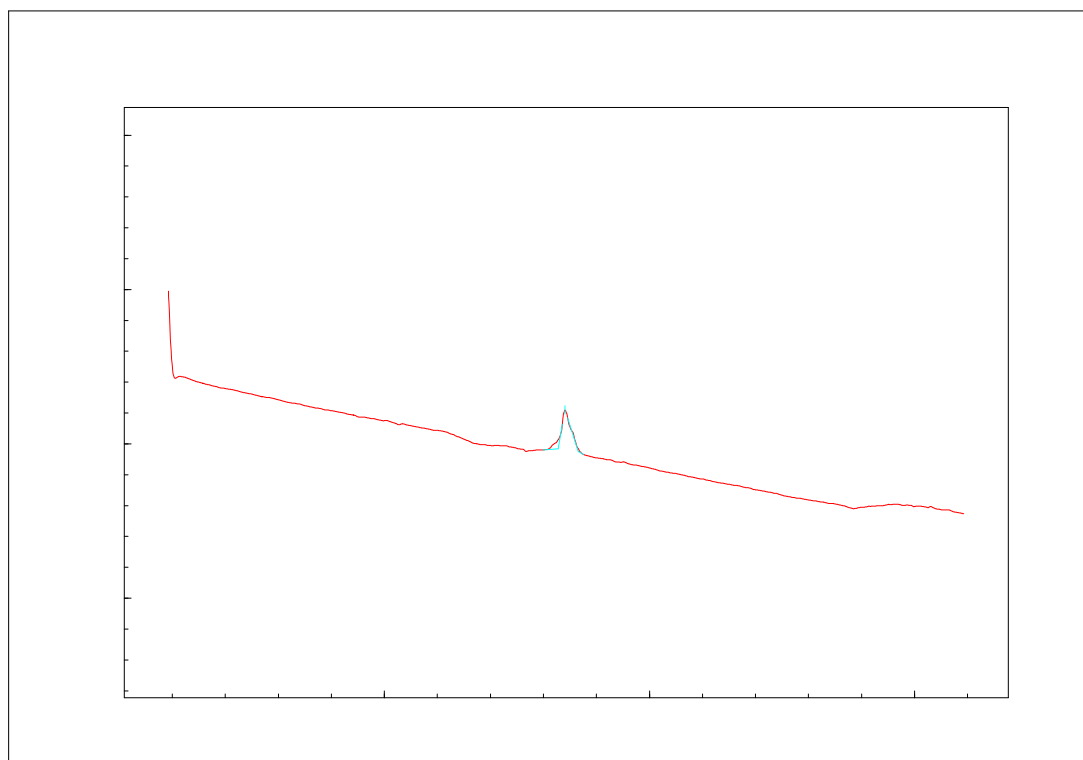

**Figure S24** DSC curve of 7 (10 °C min<sup>-1</sup>)

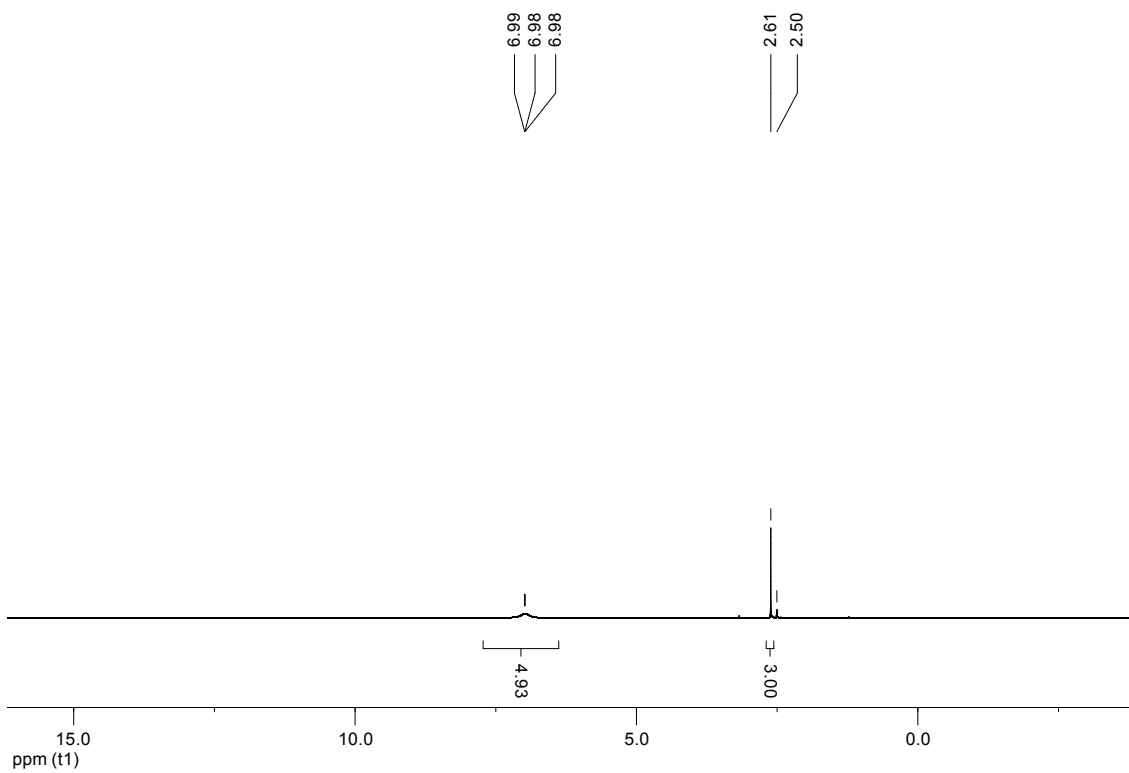

**Figure S25**  $^1\text{H}$  NMR spectrum of **7**

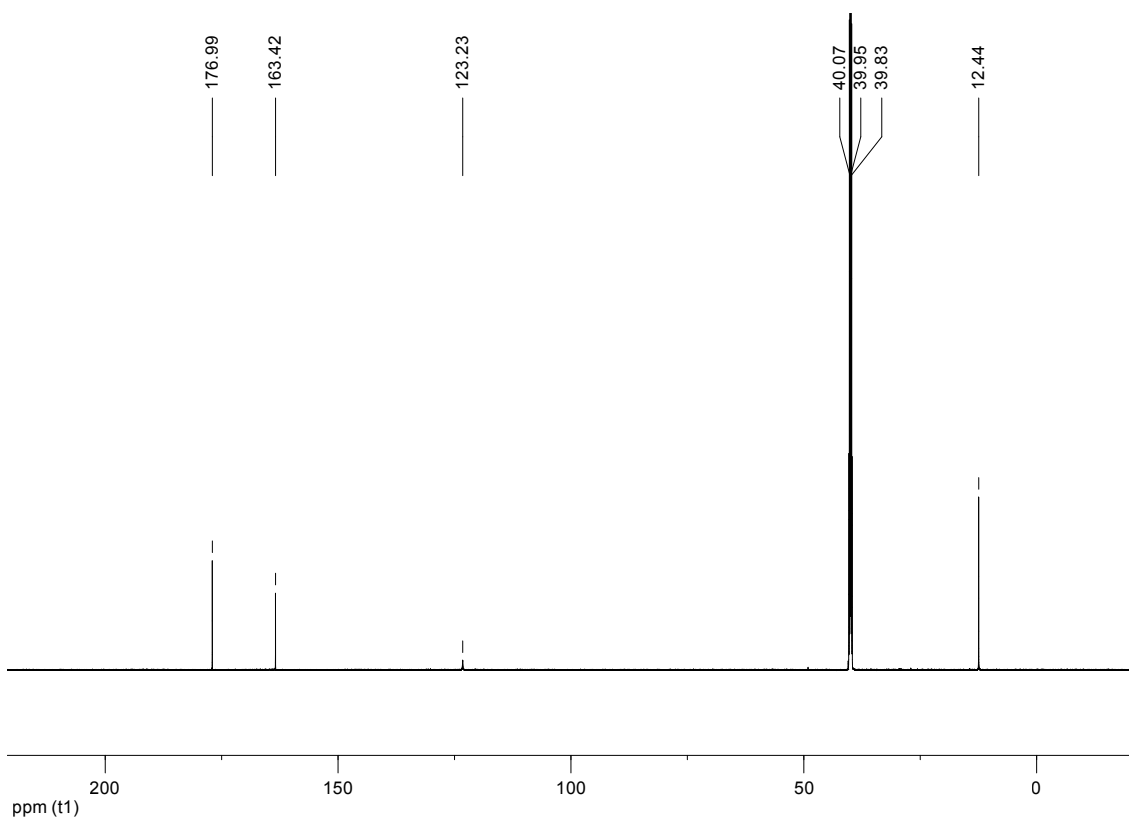

**Figure S26**  $^{13}\text{C}$  NMR spectrum of **7**.

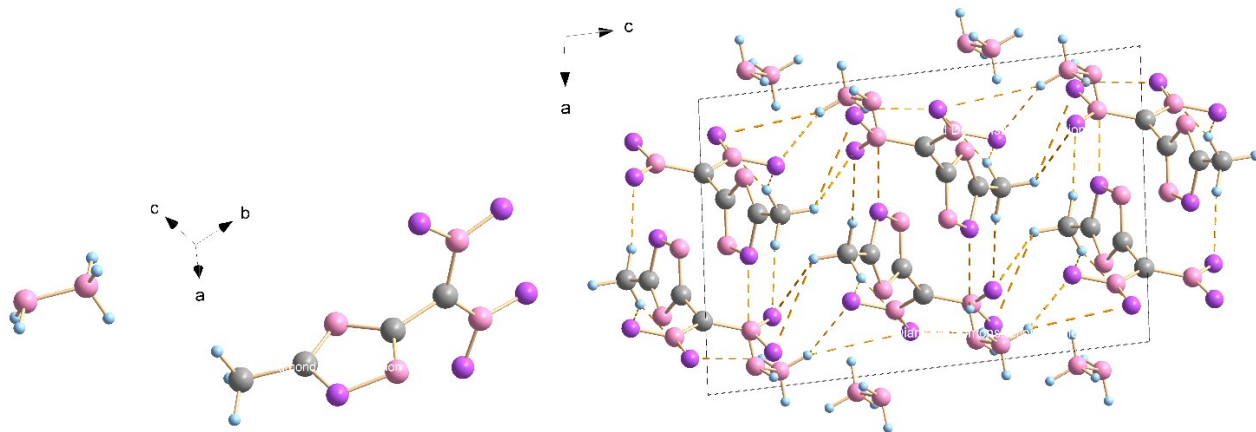

**Figure S27** X-ray crystal of 7

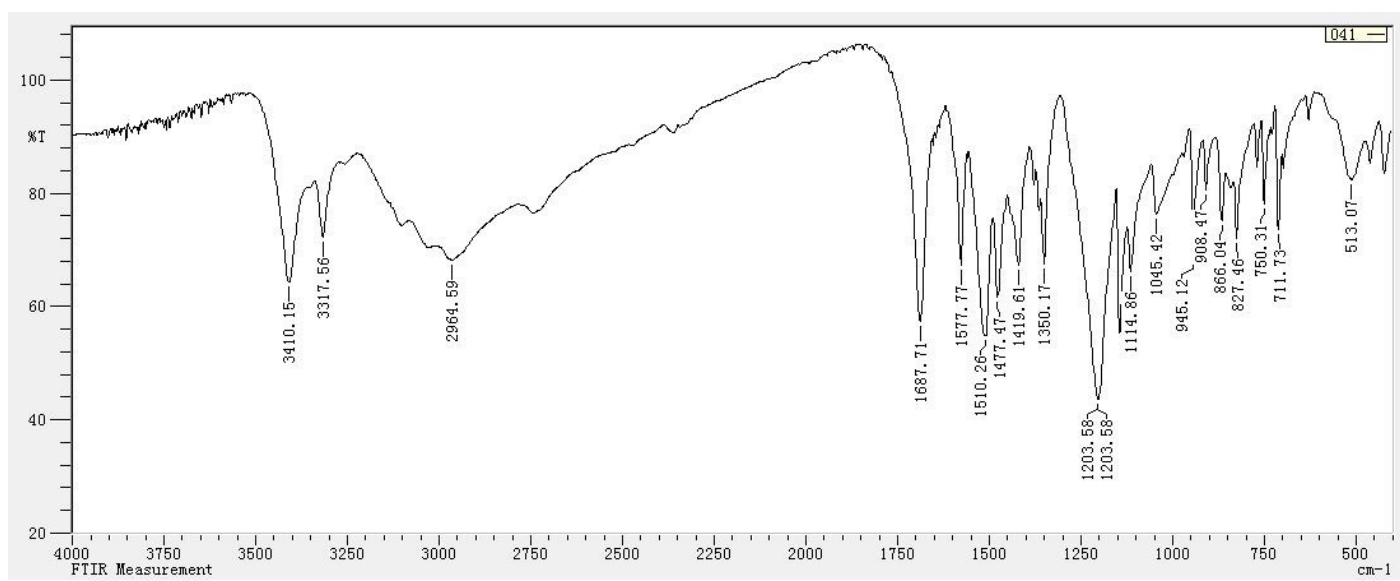

**Figure S28** IR spectrum of 8.

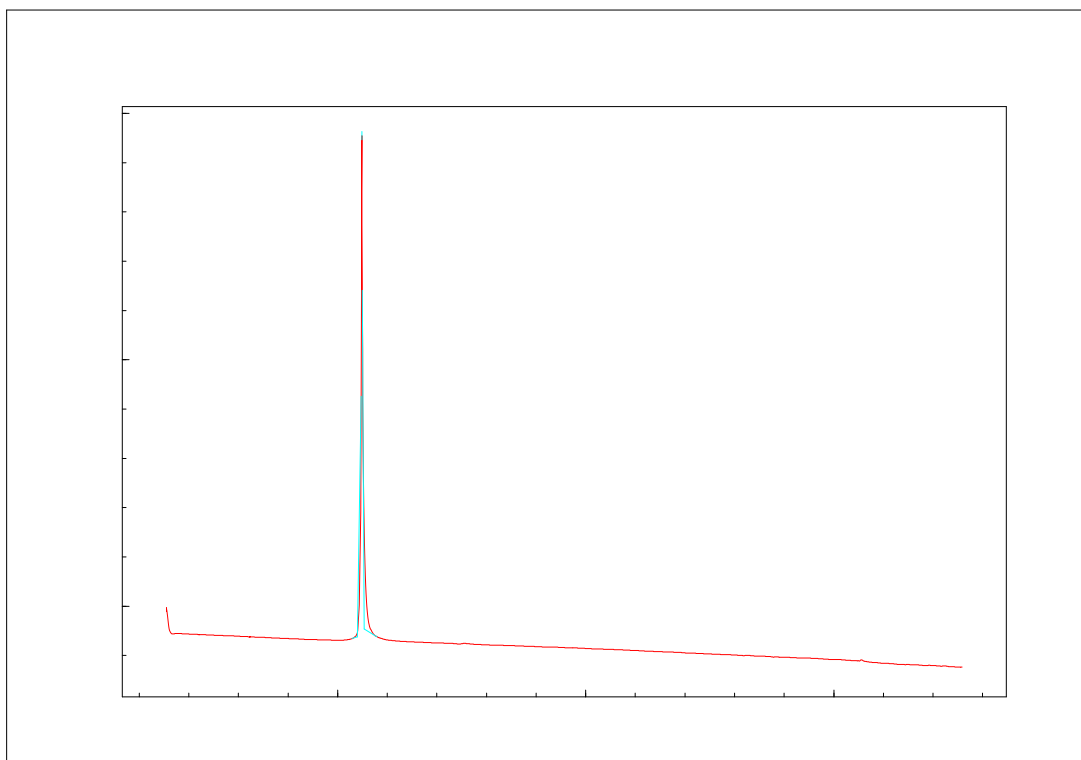

**Figure S29** DSC curve of **8** ( $10\text{ }^{\circ}\text{C min}^{-1}$ )

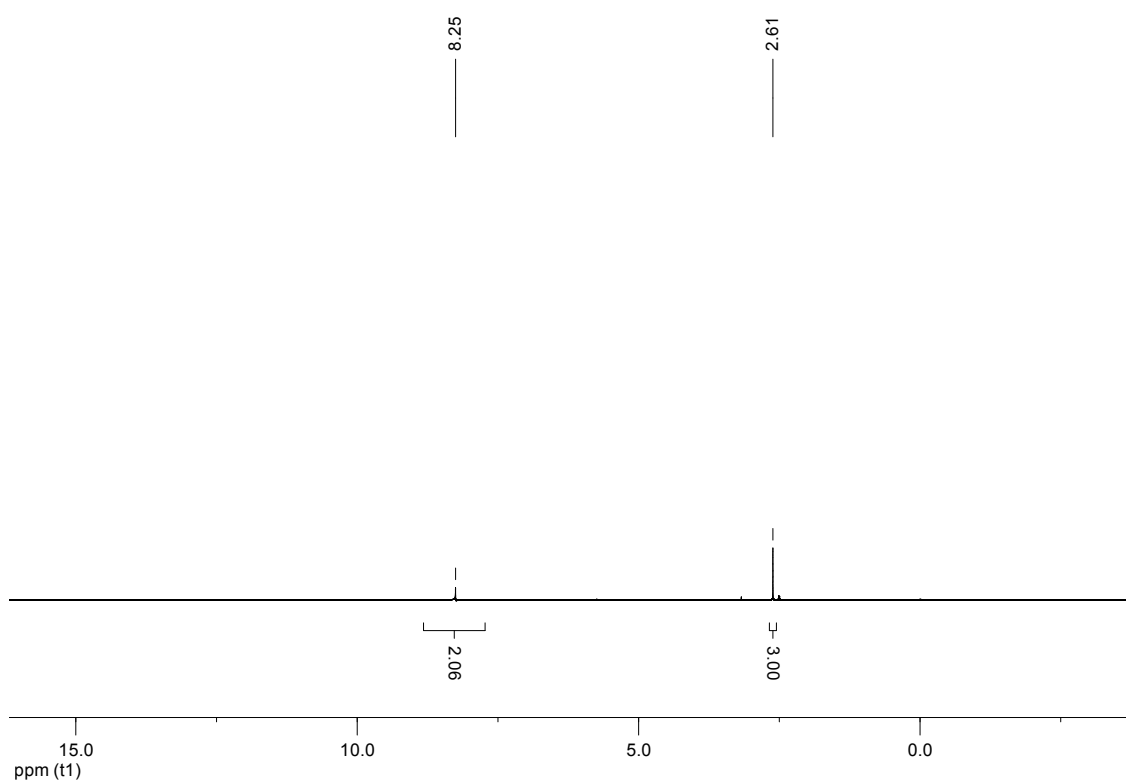

**Figure S30**  $^1\text{H}$  NMR spectrum of **8**

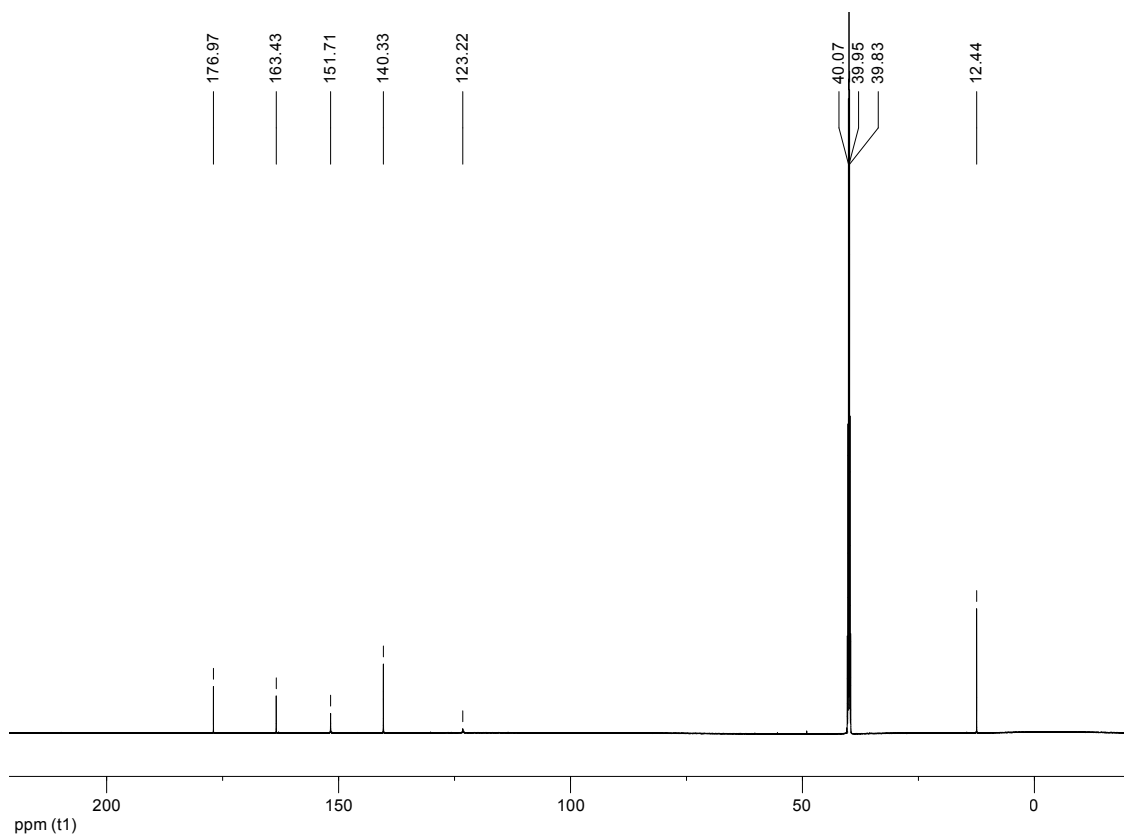

**Figure S31**  $^{13}\text{C}$  NMR spectrum of **8**.

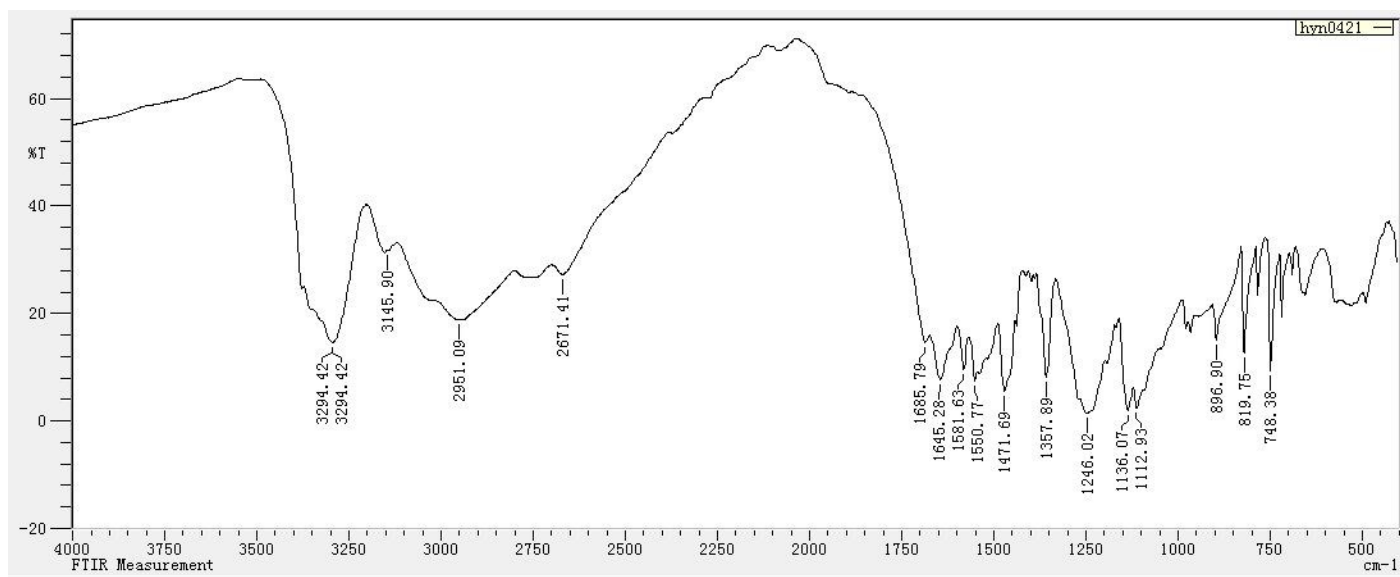

**Figure S32** IR spectrum of **9**.

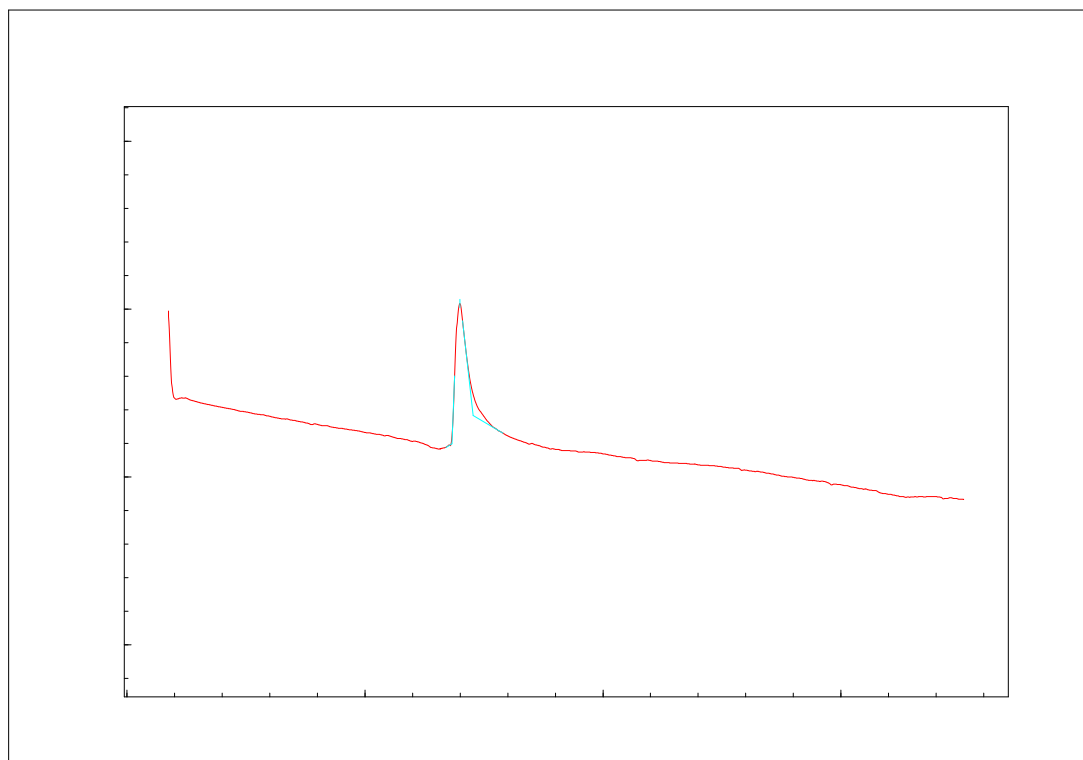

**Figure S33** DSC curve of **9** (10 °C min<sup>-1</sup>)

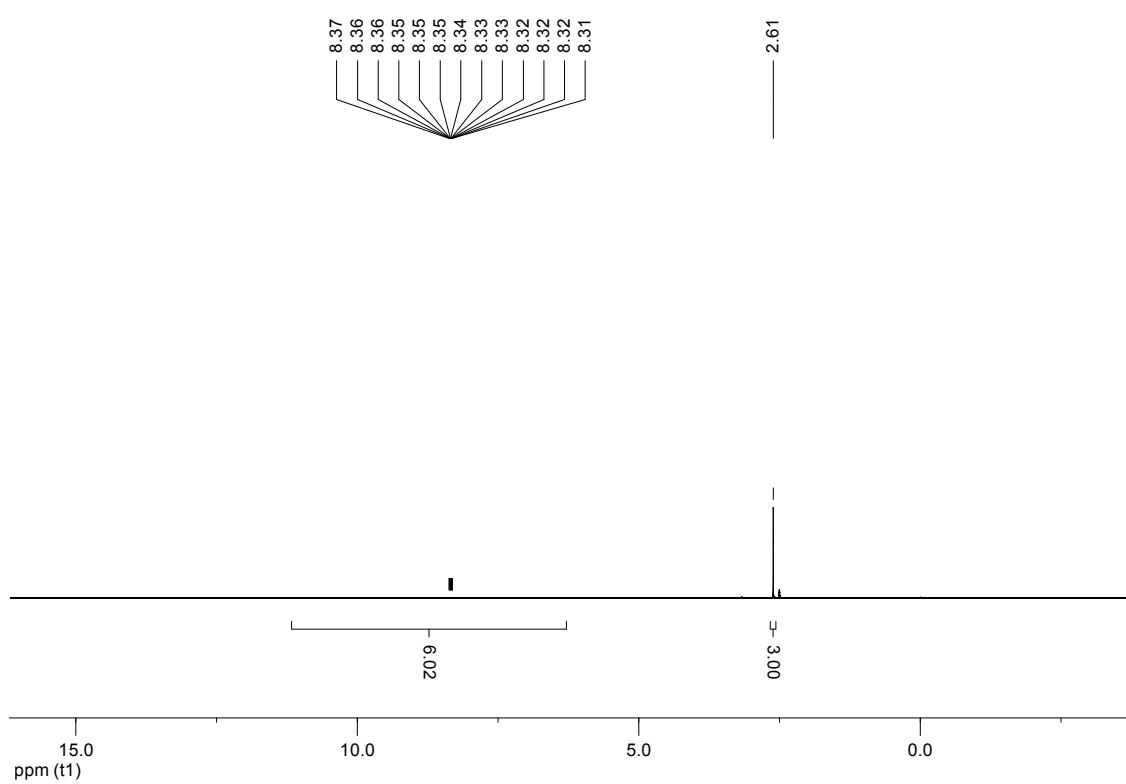

**Figure S34** <sup>1</sup>H NMR spectrum of **9**

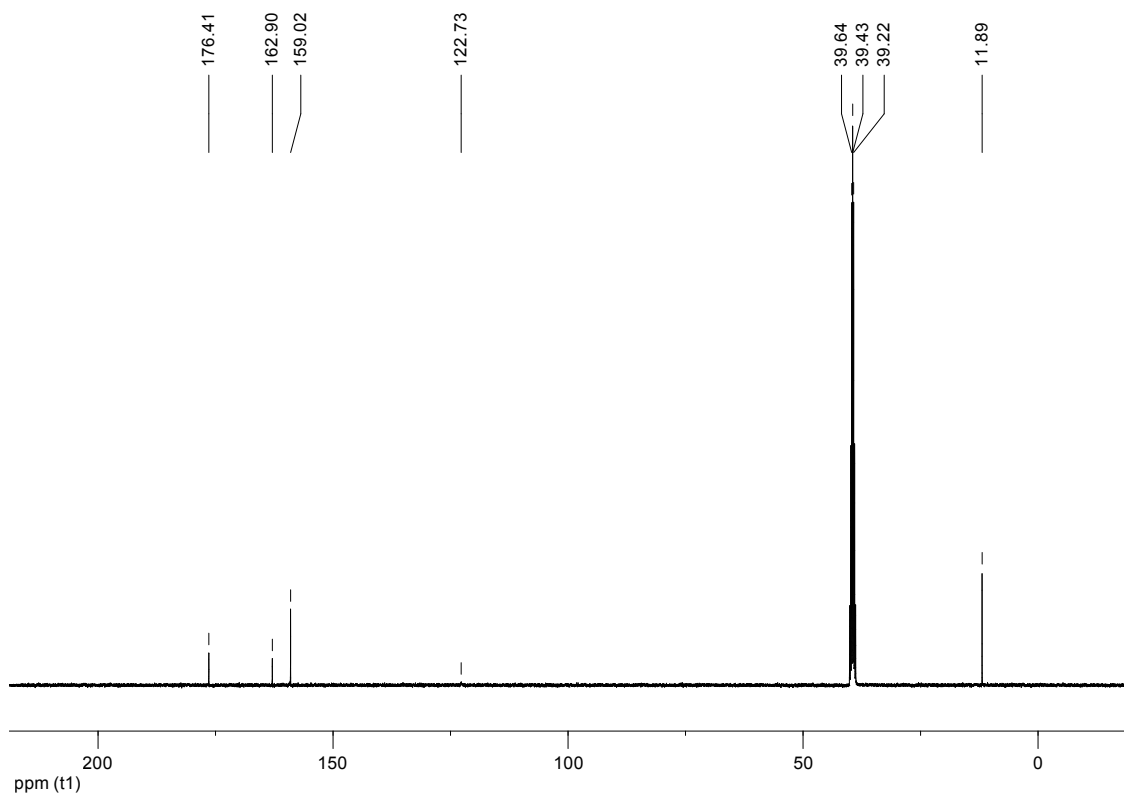

**Figure S35**  $^{13}\text{C}$  NMR spectrum of **9**.

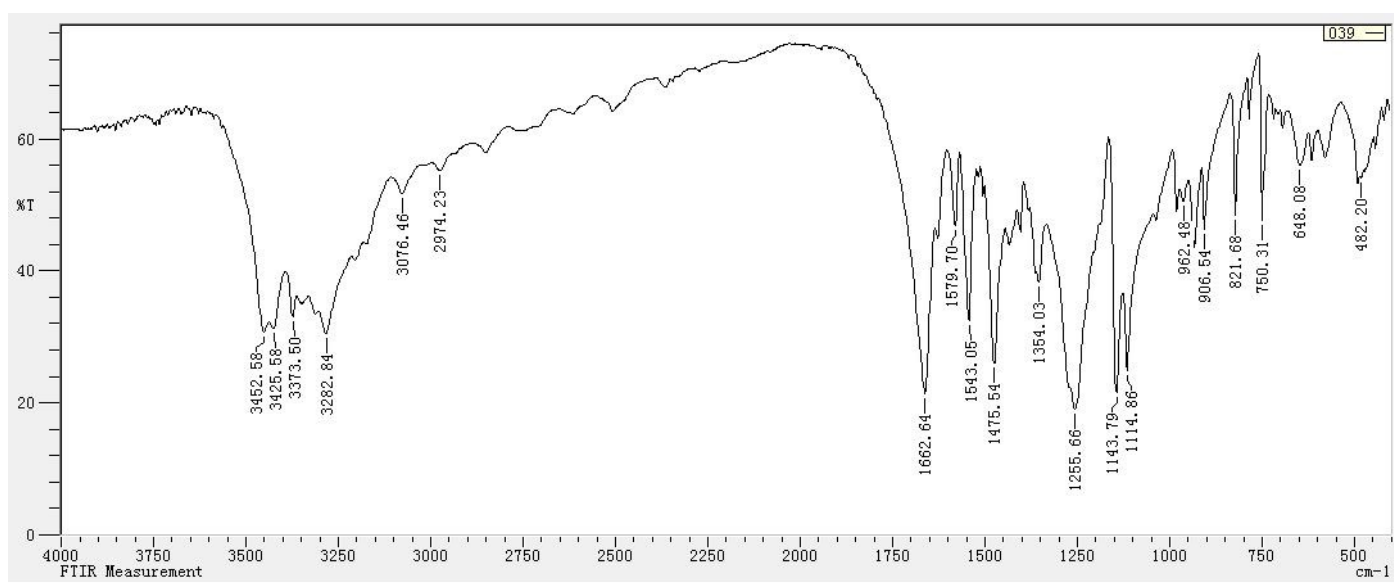

**Figure S36** IR spectrum of **10**.

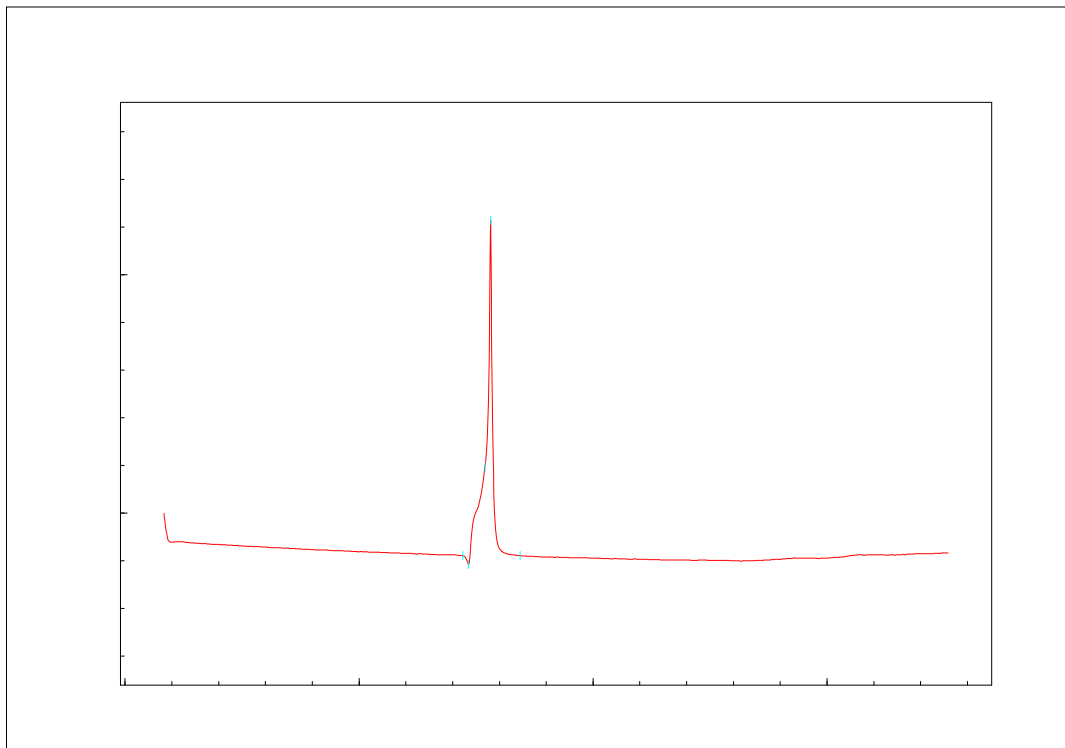

**Figure S37** DSC curve of **10** ( $10\text{ }^{\circ}\text{C min}^{-1}$ )

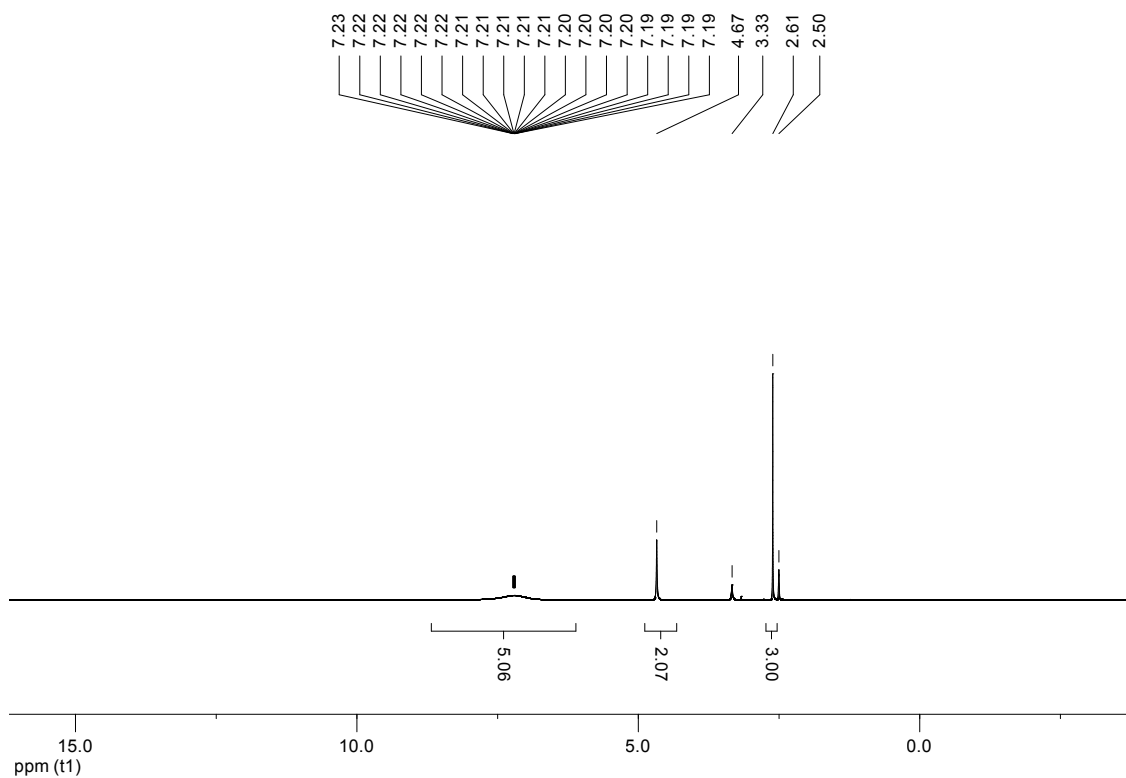

**Figure S38**  $^1\text{H}$  NMR spectrum of **10**



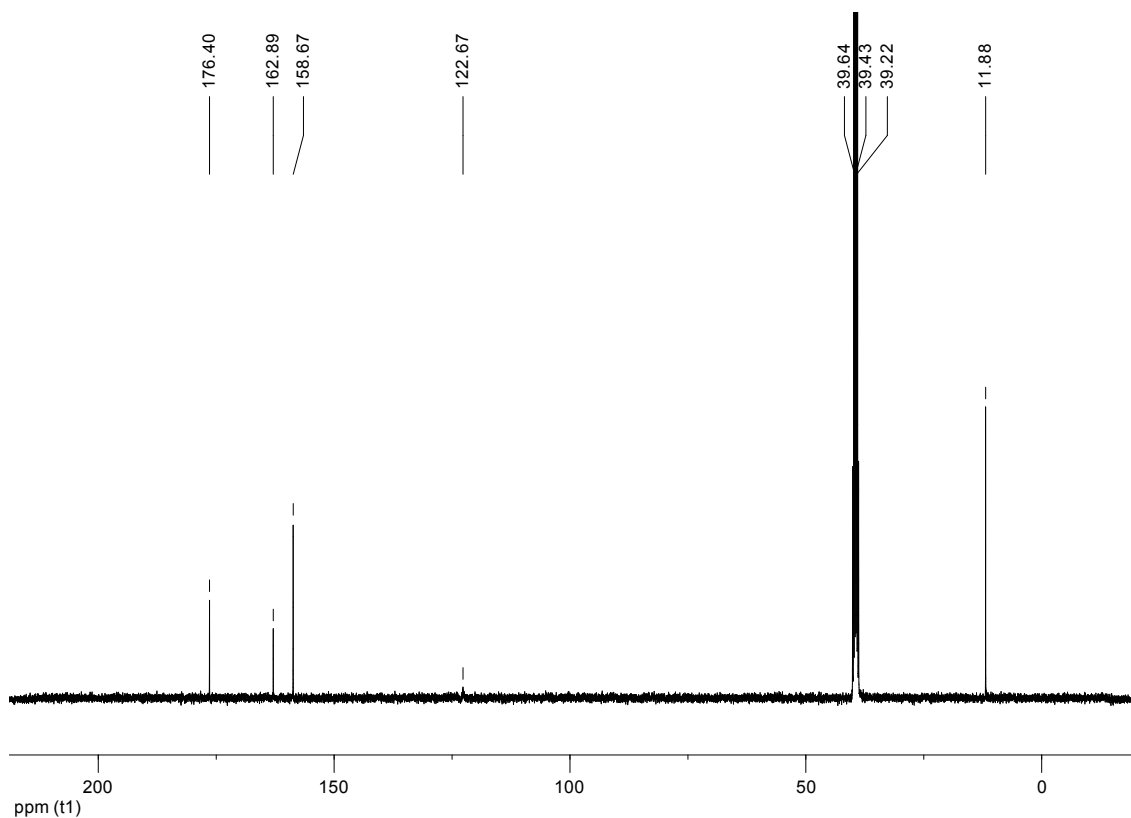

**Figure S39**  $^{13}\text{C}$  NMR spectrum of **10**.

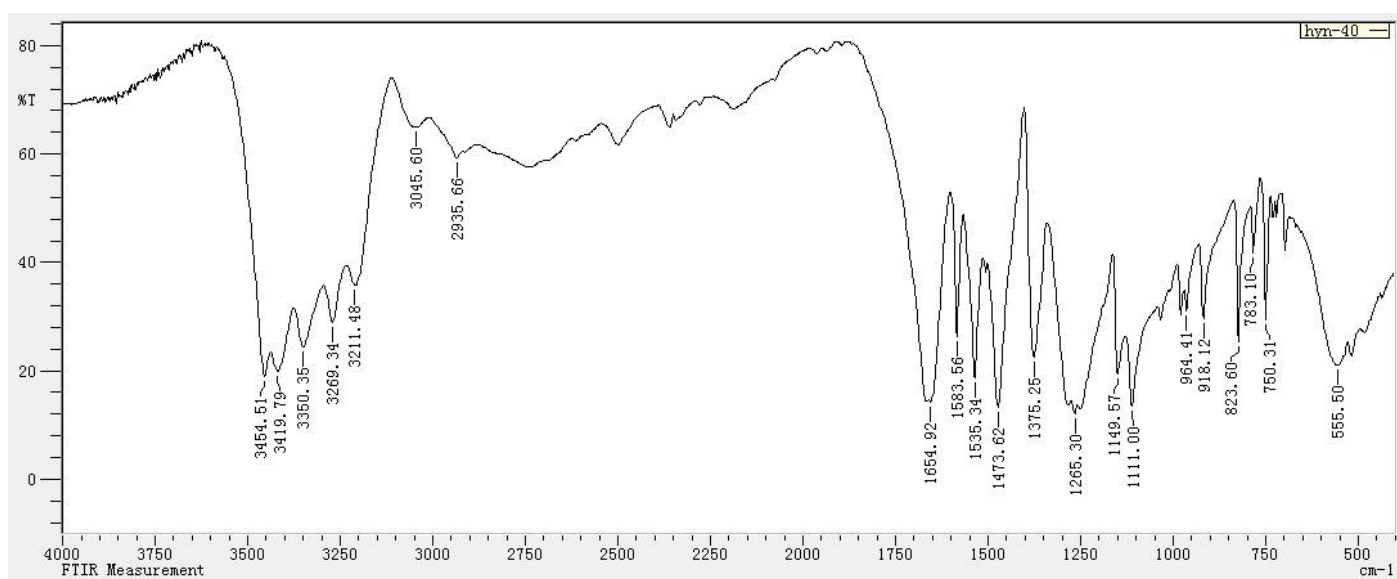

**Figure S40** IR spectrum of **11**.

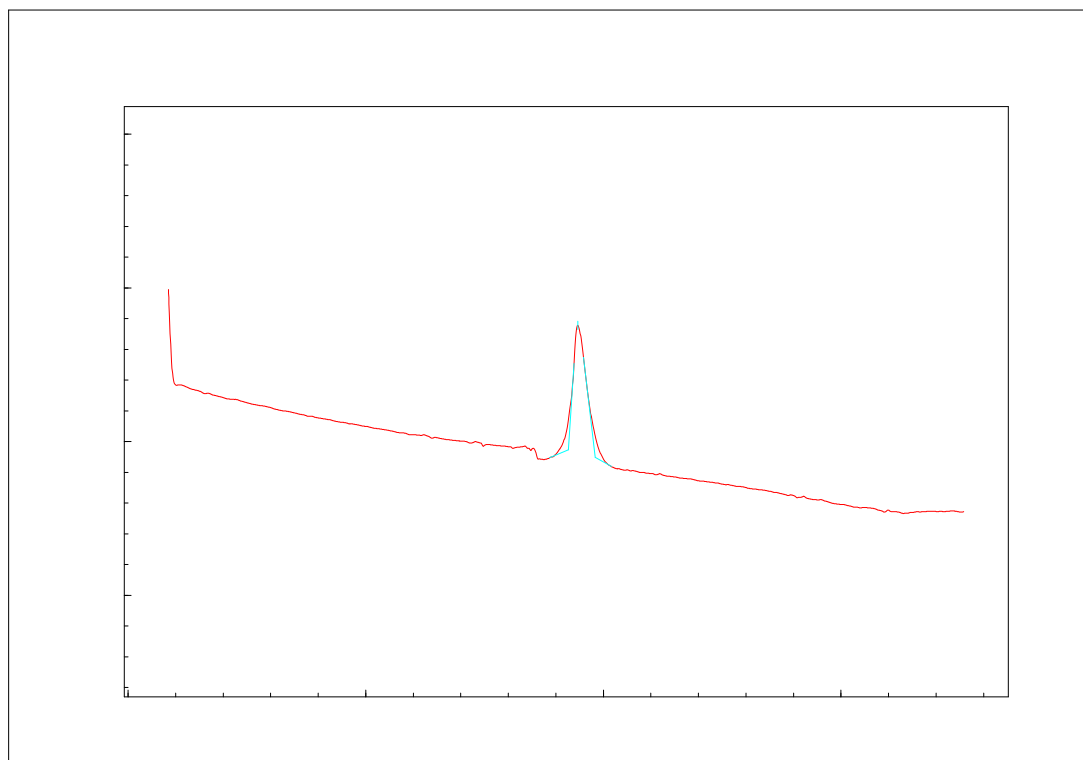

**Figure S41** DSC curve of **11** ( $10\text{ }^{\circ}\text{C min}^{-1}$ )

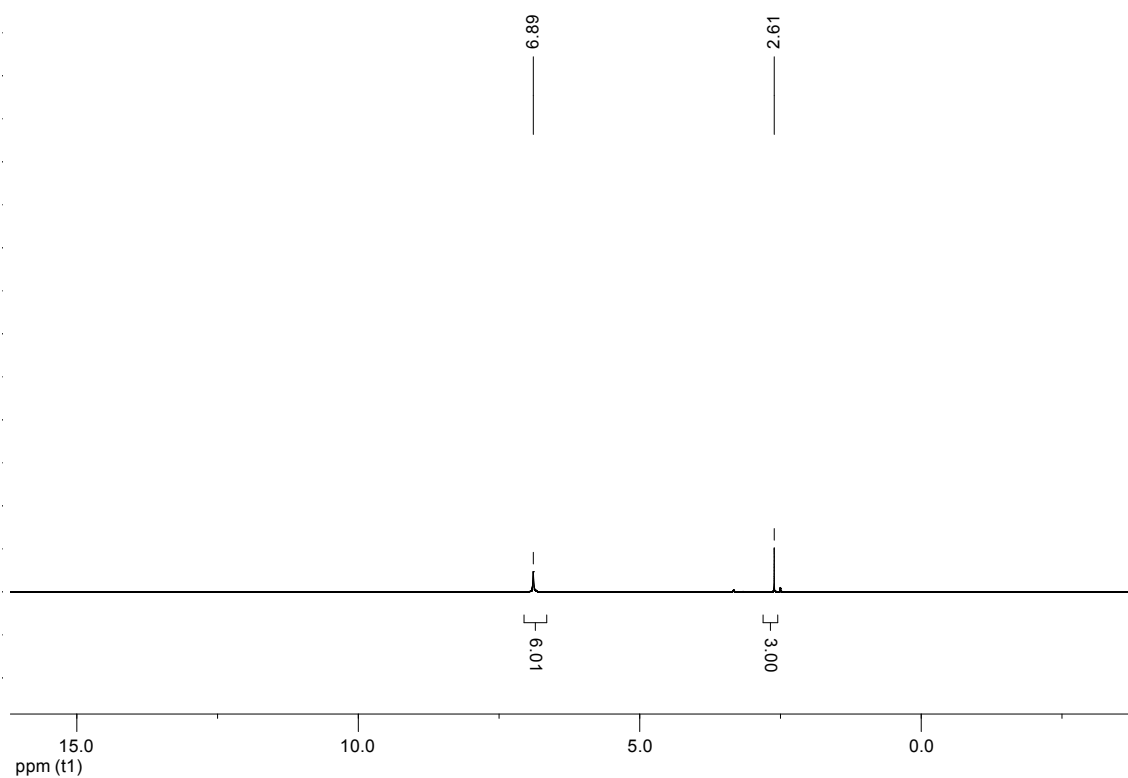

**Figure S42**  $^1\text{H}$  NMR spectrum of **11**

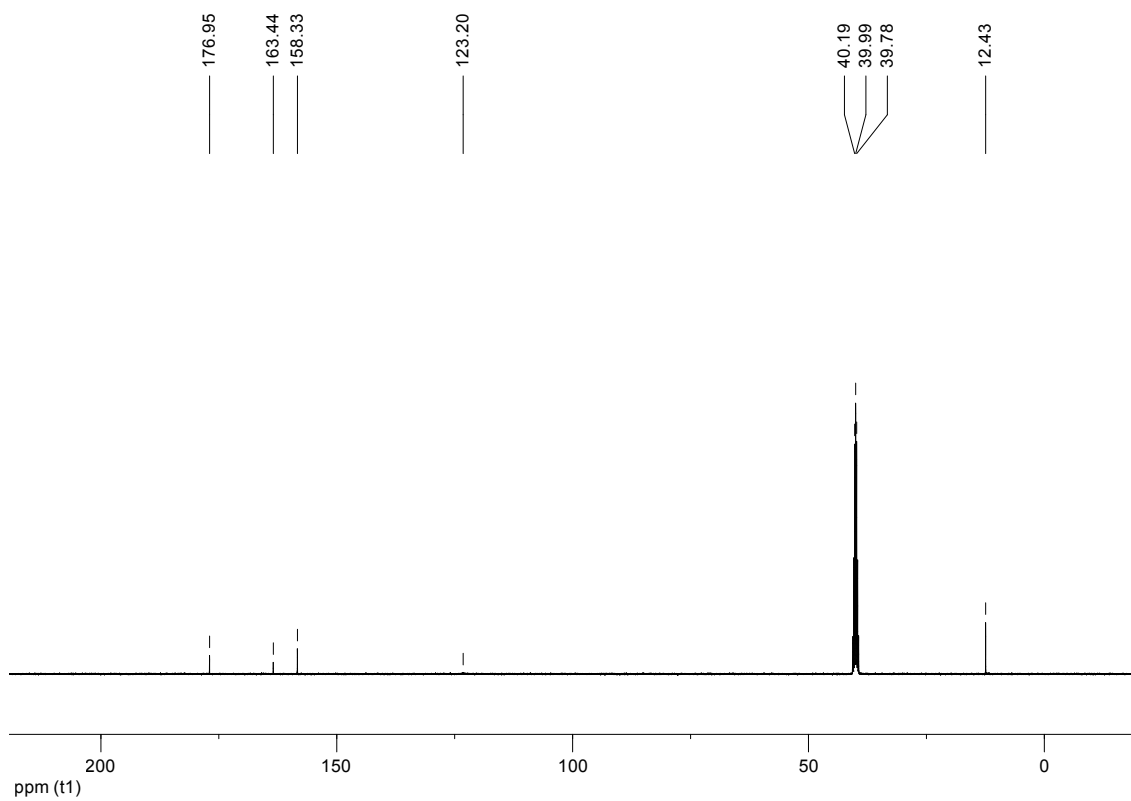

**Figure S43**  $^{13}\text{C}$  NMR spectrum of **11**.
